# Supplementary material for: Hyperspectral mapping of density, porosity, stiffness, and strength in hydrothermally altered volcanic rocks
Source: Copernicus journal article supplement (doi:10.5194/se-16-1249-2025), 2025-11-03
Supplement: Supplementary file 1 [file SWIR_MWIR_LWIR_SpecLib_v3b.xlsx]

## Sheet: Sheet1
	ID	roi_name	volcano	country	rock type	density	porosity	UCS_MPa	UCS2_MPa	E_GPa	diameter_mm	length_mm	Loading	378.2	381.6	384.9	388.3	391.6	395.0	398.4	401.7	405.1	408.5	411.9	415.2	418.6	422.0	425.4	428.7	432.1	435.5	438.9	442.3	445.6	449.0	452.4	455.8	459.2	462.6	466.0	469.4	472.8	476.2	479.6	483.0	486.4	489.8	493.2	496.6
0	cm_13_05	1305	Cracked Mountain	Canada	clastic	2.01085	0.269	27.5	27.47	8.70	20	40	uni_13_05_d.txt	0.376082	0.360599	0.353341	0.343388	0.316685	0.306157	0.281872	0.271848	0.248569	0.242145	0.229399	0.222026	0.230721	0.215943	0.219779	0.218546	0.210563	0.215894	0.215277	0.209169	0.213118	0.214016	0.216416	0.217131	0.219851	0.218993	0.217022	0.217149	0.21827	0.216776	0.220282	0.219465	0.22408	0.22555	0.229366	0.231926
1	cm_15_02	1502	Cracked Mountain	Canada	clastic	1.64884	0.365	12.7	12.73	2.42	20	40	uni_15_02_d.txt	0.300248	0.263177	0.253261	0.238929	0.255699	0.213501	0.207206	0.206921	0.203214	0.171916	0.160942	0.164043	0.163128	0.15552	0.160245	0.164646	0.154439	0.155701	0.159268	0.154322	0.153596	0.157277	0.154878	0.153284	0.156358	0.156622	0.156694	0.158106	0.158877	0.15819	0.159029	0.161823	0.163877	0.165943	0.170381	0.173833
2	cm_15_05	1505	Cracked Mountain	Canada	clastic	1.57195	0.412	4.9	4.93	0.99	20	40	uni_15_05_d.txt	0.334748	0.2659	0.253438	0.25314	0.252762	0.219453	0.215958	0.198213	0.183359	0.163661	0.157158	0.15163	0.152021	0.14222	0.145085	0.14575	0.138293	0.135434	0.134012	0.134361	0.133435	0.133055	0.132331	0.135736	0.134301	0.130038	0.132704	0.133166	0.133508	0.131909	0.135898	0.138185	0.139994	0.142251	0.14608	0.149576
3	cm_17_03	1703	Cracked Mountain	Canada	clastic	1.69064	0.35	9.3	9.33	2.16	20	40	uni_17_03_d.txt	0.329746	0.338621	0.296251	0.271478	0.305115	0.306684	0.282255	0.288248	0.259845	0.245638	0.25239	0.262905	0.263183	0.262949	0.264233	0.268472	0.261721	0.267838	0.267011	0.272048	0.265898	0.273817	0.272611	0.272896	0.272325	0.271822	0.271081	0.270556	0.268513	0.269678	0.26901	0.269245	0.270436	0.272691	0.273037	0.27584
4	cm_17_04	1704	Cracked Mountain	Canada	clastic	1.66449	0.356	11.1	11.14	2.68	20	40	uni_17_04_d.txt	0.357099	0.30014	0.32276	0.309279	0.309014	0.308135	0.317001	0.284394	0.293932	0.25798	0.286039	0.267712	0.28505	0.265657	0.273306	0.286773	0.277488	0.284584	0.288741	0.282937	0.285013	0.290364	0.289909	0.289784	0.290349	0.290701	0.28682	0.288803	0.290345	0.287773	0.289914	0.289433	0.291124	0.293099	0.294405	0.295838
5	cm_18_01	1801	Cracked Mountain	Canada	clastic	1.73368	0.384	16	16.01	4.26	20	40	uni_18_01_d.txt	0.303247	0.323133	0.320096	0.285275	0.301531	0.274142	0.265613	0.263245	0.233054	0.235079	0.238331	0.233364	0.238908	0.241103	0.225372	0.236135	0.229572	0.229836	0.234699	0.2351	0.233374	0.234079	0.235089	0.23804	0.242527	0.242207	0.235907	0.240858	0.239896	0.240173	0.239768	0.241672	0.244288	0.24558	0.246457	0.250409
6	cm_18_05	1805	Cracked Mountain	Canada	clastic	1.6896	0.343	18.6	18.63	4.23	20	40	uni_18_05_d.txt	0.260636	0.226876	0.211079	0.232148	0.220234	0.190407	0.19803	0.203521	0.216474	0.211552	0.210751	0.209275	0.217189	0.205917	0.208523	0.21089	0.210531	0.222631	0.223903	0.220186	0.222191	0.232316	0.230337	0.232234	0.233934	0.234472	0.233639	0.234143	0.237048	0.235683	0.239528	0.239164	0.243385	0.246861	0.250028	0.253319
7	cm_20_01	2001	Cracked Mountain	Canada	clastic	1.68407	0.382	7.5	7.53	2.41	20	40	uni_20_01_d.txt	0.191149	0.220781	0.175233	0.159	0.183437	0.157867	0.181663	0.171491	0.160716	0.150685	0.141694	0.136579	0.134813	0.138744	0.136896	0.138881	0.137368	0.136996	0.137683	0.130187	0.136424	0.134006	0.136567	0.138392	0.139443	0.139654	0.137201	0.145406	0.142754	0.142141	0.148893	0.146998	0.150923	0.152431	0.156321	0.161297
8	cm_20_02	2002	Cracked Mountain	Canada	clastic	1.59432	0.423	7.6	7.58	2.07	20	40	uni_20_02_d.txt	0.152665	0.15253	0.156697	0.129622	0.132473	0.131922	0.142891	0.137397	0.129441	0.144503	0.145629	0.147975	0.138213	0.152927	0.154641	0.153817	0.156341	0.161965	0.163896	0.160042	0.166155	0.168284	0.170314	0.174347	0.172437	0.175324	0.175878	0.179697	0.178879	0.180681	0.184367	0.186527	0.18991	0.192144	0.195883	0.199376
9	cm_20_05	2005	Cracked Mountain	Canada	clastic	1.7301	0.371	12.1	12.11	5.12	20	40	uni_20_05_d.txt	0.175171	0.162346	0.175861	0.141068	0.142005	0.143994	0.150465	0.140495	0.149455	0.150232	0.153734	0.150734	0.148847	0.149294	0.155133	0.154313	0.157872	0.158879	0.167142	0.159951	0.162376	0.164129	0.170857	0.167772	0.169104	0.171074	0.168833	0.172861	0.174693	0.175457	0.175406	0.177955	0.181095	0.183143	0.186455	0.189465
10	cm_22_08	2208	Cracked Mountain	Canada	clastic	1.47863	0.435	11	10.99	2.66	20	40	uni_22_08_d.txt	0.422386	0.374238	0.371502	0.362921	0.344775	0.323406	0.288798	0.277386	0.259371	0.24825	0.233484	0.233347	0.22448	0.230486	0.227786	0.224068	0.221875	0.220575	0.220459	0.216848	0.220456	0.221766	0.222745	0.224491	0.225705	0.224221	0.223918	0.225746	0.226156	0.227041	0.229309	0.229238	0.231763	0.233923	0.236812	0.239817
11	cm_22_12	2212	Cracked Mountain	Canada	clastic	1.72793	0.343	23.6	23.63	5.97	20	40	uni_22_12_d.txt	0.374888	0.333218	0.349583	0.334603	0.33261	0.288338	0.282779	0.269329	0.252361	0.246338	0.23051	0.224761	0.234393	0.230391	0.234242	0.228415	0.22179	0.225261	0.221274	0.215277	0.2175	0.215089	0.215281	0.21985	0.215755	0.217188	0.215676	0.215757	0.212727	0.213037	0.212216	0.212579	0.214176	0.215501	0.215907	0.219026
12	cm_23_02	2302	Cracked Mountain	Canada	clastic	1.7569	0.362	8.4	8.44	1.57	20	40	uni_23_02_d.txt	0.344269	0.322668	0.325473	0.3377	0.329803	0.297447	0.265636	0.258545	0.23068	0.22696	0.227225	0.234534	0.240465	0.236732	0.237802	0.244042	0.237526	0.242142	0.240987	0.241045	0.240864	0.241464	0.243853	0.248997	0.24272	0.246243	0.24781	0.246958	0.248778	0.247127	0.251009	0.251732	0.252087	0.257589	0.25936	0.264972
13	cm_23_06	2306	Cracked Mountain	Canada	clastic	1.66376	0.369	11.9	11.89	2.69	20	40	uni_23_06_d.txt	0.363498	0.312033	0.329037	0.3016	0.286062	0.26178	0.260113	0.260543	0.234888	0.2242	0.210623	0.20839	0.212539	0.214758	0.211477	0.208507	0.206696	0.211202	0.204432	0.202935	0.202749	0.205849	0.205607	0.20419	0.201693	0.204137	0.202266	0.202666	0.20188	0.200569	0.203525	0.201766	0.204839	0.206283	0.208209	0.210873
14	cm_23_12	2312	Cracked Mountain	Canada	clastic	1.73045	0.359	9.9	9.86	3.14	20	40	uni_23_12_d.txt	0.334902	0.27998	0.34736	0.328123	0.278951	0.288214	0.260609	0.263161	0.247964	0.252036	0.22925	0.247238	0.242544	0.238503	0.24179	0.239788	0.241536	0.246296	0.251736	0.241685	0.247631	0.247968	0.249247	0.25383	0.254396	0.249791	0.251333	0.254832	0.252155	0.255981	0.256977	0.254581	0.257352	0.257937	0.260945	0.264427
15	cm_24_03	2403	Cracked Mountain	Canada	clastic	1.48785	0.45	3.2	3.21	0.87	20	40	uni_24_03_d.txt	0.473087	0.384346	0.411118	0.319779	0.332765	0.30415	0.245499	0.275257	0.237483	0.204018	0.20042	0.196074	0.195494	0.196932	0.177438	0.185273	0.174109	0.175094	0.17449	0.165849	0.165609	0.162739	0.164011	0.166271	0.165347	0.164239	0.160804	0.16547	0.163903	0.165039	0.165378	0.165177	0.167106	0.169417	0.170924	0.173703
16	cm_28_07	2807	Cracked Mountain	Canada	clastic	1.59421	0.372	11.7	11.72	2.48	20	40	uni_28_7_d.txt	0.374493	0.342384	0.346215	0.341178	0.332364	0.311154	0.278493	0.27797	0.290373	0.279612	0.271755	0.28442	0.271811	0.282189	0.280941	0.276962	0.280207	0.283105	0.282474	0.283415	0.28859	0.286509	0.288354	0.287605	0.2885	0.288736	0.28838	0.291032	0.288598	0.287854	0.291937	0.289271	0.290546	0.292963	0.295107	0.298527
17	cm_28_09	2809	Cracked Mountain	Canada	clastic	1.91994	0.289	27.9	27.93	6.58	20	40	uni_28_09_d.txt	0.418447	0.336173	0.343534	0.380942	0.315465	0.287624	0.276531	0.270305	0.24576	0.249199	0.229506	0.236359	0.228416	0.234977	0.221489	0.225816	0.219461	0.223438	0.216758	0.220589	0.220251	0.218917	0.217608	0.223193	0.215978	0.216274	0.22527	0.217355	0.219186	0.216614	0.218671	0.218206	0.220232	0.222404	0.226103	0.229807
18	cm_28_10	2810	Cracked Mountain	Canada	clastic	1.88888	0.302	27.7	27.70	7.79	20	40	uni_28_10_d.txt	0.420441	0.393542	0.388416	0.393922	0.360627	0.333662	0.323836	0.301594	0.268595	0.270106	0.253046	0.249237	0.249774	0.251432	0.246046	0.247628	0.242596	0.24528	0.243685	0.241124	0.245199	0.244049	0.246228	0.244159	0.247932	0.248184	0.248528	0.247525	0.248005	0.248568	0.249339	0.249921	0.253768	0.254326	0.256925	0.262067
19	cm_28_11	2811	Cracked Mountain	Canada	clastic	1.88149	0.303	28.3	28.28	9.45	20	40	uni_28_11_d.txt	0.469188	0.471105	0.376538	0.408673	0.385167	0.342726	0.323322	0.313545	0.270558	0.27234	0.250133	0.257571	0.257165	0.251185	0.252493	0.24693	0.244436	0.246934	0.248051	0.236134	0.243111	0.244363	0.240988	0.244765	0.246084	0.245722	0.24136	0.244588	0.244412	0.244937	0.244289	0.246475	0.248349	0.250129	0.25351	0.257209
20	cm_28_13	2813	Cracked Mountain	Canada	clastic	1.91037	0.274	33.4	33.36	8.62	20	40	uni_28_13_d.txt	0.45004	0.425334	0.357747	0.37332	0.34369	0.367137	0.342161	0.327093	0.313496	0.288868	0.271126	0.267452	0.261	0.267644	0.265359	0.269288	0.259599	0.258613	0.263294	0.258656	0.265731	0.265619	0.265427	0.27002	0.269253	0.271823	0.269488	0.269981	0.270197	0.272646	0.270478	0.272026	0.272999	0.276573	0.279325	0.284149
21	cm_28_15	2815	Cracked Mountain	Canada	clastic	1.7389	0.37	6.6	6.63	3.21	20	40	uni_28_15_d.txt	0.336981	0.287383	0.306504	0.265979	0.253417	0.256072	0.209135	0.222643	0.208078	0.206604	0.186831	0.186505	0.179151	0.17708	0.177235	0.176008	0.170474	0.171032	0.166794	0.167417	0.167735	0.166995	0.169637	0.17053	0.167566	0.17212	0.170248	0.171581	0.170198	0.169369	0.168334	0.169769	0.172037	0.173646	0.172517	0.175896
22	cm_28_21	2821	Cracked Mountain	Canada	clastic	1.89103	0.294	22	21.99	5.29	20	40	uni_28_21_d.txt	0.364219	0.369242	0.341104	0.357813	0.329782	0.296866	0.285468	0.251107	0.24836	0.234455	0.228636	0.237249	0.23381	0.229431	0.23141	0.225989	0.21794	0.226316	0.225911	0.222855	0.223739	0.224655	0.230764	0.228759	0.231611	0.228943	0.229683	0.231076	0.228965	0.23056	0.231668	0.232972	0.235813	0.236456	0.240236	0.243546
23	cm_28_25	2825	Cracked Mountain	Canada	clastic	1.72809	0.356	17.8	17.82	5.17	20	40	uni_28_25_d.txt	0.316046	0.300871	0.353145	0.322149	0.289952	0.241056	0.2266	0.238807	0.235718	0.224119	0.210297	0.21153	0.214476	0.210389	0.218376	0.21252	0.214202	0.220201	0.21393	0.212674	0.212748	0.214034	0.213884	0.2157	0.219271	0.217933	0.219363	0.217002	0.216873	0.217832	0.219357	0.219895	0.222107	0.222256	0.226429	0.230045
24	cm_28_29	2829	Cracked Mountain	Canada	clastic	1.62572	0.4	15.6	15.59	4.41	20	40	uni_28_29_d.txt	0.384982	0.363029	0.334623	0.328923	0.328626	0.283667	0.246698	0.263105	0.238905	0.227496	0.211776	0.226475	0.218259	0.211704	0.215437	0.21007	0.209289	0.207524	0.208251	0.205787	0.200651	0.202518	0.201346	0.202649	0.203201	0.203184	0.204582	0.202277	0.201598	0.20139	0.201706	0.200487	0.202853	0.203196	0.204642	0.208409
25	cm_29_01	2901	Cracked Mountain	Canada	clastic	1.8313	0.309	24.8	24.84	6.31	20	40	uni_29_01_d.txt	0.300628	0.317112	0.326801	0.312869	0.327467	0.269834	0.263983	0.282087	0.259131	0.237175	0.232766	0.235233	0.233855	0.234414	0.219977	0.228694	0.228332	0.232206	0.225413	0.223823	0.223427	0.223173	0.223355	0.226105	0.226416	0.230677	0.229633	0.229639	0.229354	0.2309	0.231814	0.2304	0.232224	0.233105	0.235946	0.237342
26	cm_29_08	2908	Cracked Mountain	Canada	clastic	1.81551	0.308	22.2	22.23	6.03	20	40	uni_29_08_d.txt	0.321819	0.296629	0.315498	0.299038	0.292062	0.265595	0.244084	0.255295	0.239033	0.229881	0.217457	0.229109	0.227514	0.228058	0.222907	0.22751	0.218842	0.225608	0.224318	0.22003	0.222379	0.224007	0.22709	0.228815	0.227387	0.226672	0.224575	0.225632	0.225739	0.223751	0.225179	0.225254	0.224873	0.226169	0.228639	0.229947
27	cm_30_03	3003	Cracked Mountain	Canada	clastic	1.57246	0.428	6.6	6.56	2.08	20	40	uni_30_03_d.txt	0.356231	0.356011	0.348344	0.328146	0.334038	0.307021	0.269473	0.250324	0.218948	0.217025	0.194086	0.202095	0.208018	0.200554	0.202615	0.19118	0.185064	0.186426	0.177774	0.177742	0.177597	0.177388	0.171336	0.177156	0.178128	0.176804	0.176661	0.179591	0.176427	0.176958	0.178904	0.178015	0.181038	0.182982	0.18375	0.188078
28	cm_30_05	3005	Cracked Mountain	Canada	clastic	1.6004	0.396	17.1	17.07	4.17	20	40	uni_30_05_d.txt	0.317763	0.328709	0.313839	0.306824	0.284865	0.25155	0.23607	0.248786	0.217587	0.215035	0.203628	0.216032	0.215475	0.213135	0.215763	0.207248	0.209638	0.214774	0.208927	0.210807	0.212709	0.216803	0.216085	0.218121	0.220412	0.220109	0.221001	0.219585	0.219596	0.222361	0.223953	0.22353	0.225678	0.227397	0.230957	0.23461
29	cm_30_13	3013	Cracked Mountain	Canada	clastic	1.69794	0.374	11.2	11.15	3.17	20	40	uni_30_13_d.txt	0.350833	0.328249	0.318248	0.323339	0.30009	0.273701	0.229449	0.245397	0.224799	0.23097	0.209131	0.220712	0.221258	0.218078	0.215025	0.220172	0.216045	0.217812	0.216556	0.213711	0.217339	0.220148	0.218946	0.222064	0.2252	0.229962	0.227532	0.230132	0.228483	0.230862	0.233163	0.234863	0.237849	0.241523	0.243105	0.250015
30	co_1_1	CO1c1	Copahue	Chile	lava	1.35575	0.51321	9.9	10.02	4.13	20	40	uni_CO1_1_d.txt	0.0613627	0.0515272	0.0641785	0.0566973	0.0607895	0.062445	0.0609256	0.0690682	0.0642952	0.0829469	0.0737918	0.0821162	0.0739402	0.0825081	0.0852674	0.0827284	0.0821204	0.0864094	0.0867452	0.0858365	0.0849723	0.0836561	0.0817365	0.0815415	0.0821471	0.0817023	0.08093	0.0810352	0.0800013	0.0805044	0.0801576	0.0785268	0.0779149	0.0772513	0.077889	0.0765667
31	co_1_2	CO1c2	Copahue	Chile	lava	1.45336	0.476086	8.69	8.69	4.27	20	40	uni_CO1_2_d.txt	0.0801437	0.0650967	0.0751327	0.077203	0.073989	0.0797167	0.0812255	0.0796249	0.0695289	0.0719376	0.0802433	0.0818881	0.0776183	0.0805355	0.0849405	0.0820118	0.0799537	0.0841787	0.0855659	0.0843168	0.0848885	0.0825904	0.0840274	0.0821974	0.0821953	0.0831263	0.0806698	0.0801177	0.0817961	0.0816665	0.0805324	0.0801164	0.0798777	0.0797045	0.0799864	0.0784288
32	co_1_3	CO1c3	Copahue	Chile	lava	1.09313	0.608763	6.18	6.18	2.65	20	40	uni_CO1_3_d.txt	0.0720702	0.0462786	0.0693986	0.0625238	0.0650534	0.0764003	0.070334	0.0686566	0.0711017	0.0731484	0.0678236	0.0683888	0.0722591	0.072631	0.0733037	0.0736704	0.0775873	0.0760582	0.0769401	0.076031	0.0768436	0.0745554	0.0758409	0.0729639	0.0718249	0.0730274	0.0715217	0.0707455	0.0714945	0.0715772	0.0712698	0.0697975	0.0700914	0.0693573	0.0692104	0.0690325
33	co_2_1	CO2c1	Copahue	Chile	lava	2.49364	0.0543927	120	111.60	31.97	20	40	uni_CO2_1_d.txt	0.0739851	0.0544308	0.0762378	0.0601363	0.0674704	0.084241	0.0942687	0.0856291	0.0851451	0.102596	0.101398	0.111417	0.106199	0.115916	0.121479	0.115271	0.119689	0.123432	0.124398	0.122891	0.123786	0.126963	0.126561	0.127958	0.129173	0.12841	0.128531	0.12702	0.128357	0.127773	0.128136	0.128782	0.127328	0.128307	0.128206	0.129563
34	co_2_2	CO2c2	Copahue	Chile	lava	2.40641	0.0830576	91.6	91.63	23.57	20	40	uni_CO2_2_d.txt	0.110223	0.118254	0.101958	0.121453	0.105125	0.110021	0.107621	0.115792	0.121207	0.129875	0.129058	0.13167	0.137078	0.148539	0.151409	0.152568	0.153937	0.151808	0.156565	0.158188	0.159279	0.161265	0.161736	0.161665	0.163532	0.162631	0.163672	0.166036	0.165301	0.166031	0.167498	0.166805	0.166696	0.16862	0.169381	0.170596
35	co_2_3	CO2c3	Copahue	Chile	lava	2.48634	0.0603195	116	116.24	21.37	20	40	uni_CO2_3_d.txt	0.133838	0.126523	0.125865	0.11653	0.120858	0.128823	0.131878	0.122262	0.119823	0.135688	0.134995	0.141262	0.146756	0.144405	0.147576	0.152776	0.150243	0.154048	0.155223	0.159442	0.15719	0.157079	0.156272	0.157691	0.155653	0.158266	0.15674	0.155636	0.15742	0.157587	0.158888	0.158308	0.159126	0.159098	0.160203	0.160709
36	co_3_1	CO3c1	Copahue	Chile	lava	1.76471	0.362336	17.4	17.42	7.63	20	40	uni_CO3_1_d.txt	0.131498	0.126948	0.108965	0.117248	0.0993688	0.100331	0.100505	0.104471	0.0942458	0.112147	0.104082	0.107795	0.11418	0.113431	0.1132	0.118356	0.115002	0.118876	0.116746	0.118748	0.114501	0.116183	0.114378	0.113285	0.113862	0.112666	0.112224	0.11123	0.11096	0.110136	0.110313	0.108814	0.109334	0.110843	0.109267	0.110459
37	co_3_2	CO3c2	Copahue	Chile	lava	1.74762	0.361696	10.9	10.92	3.50	20	40	uni_CO3_2_d.txt	0.0881077	0.105228	0.0827703	0.0876207	0.0820438	0.0952077	0.0863901	0.0773954	0.0906378	0.0997944	0.0856518	0.102417	0.109131	0.105457	0.116727	0.112433	0.113194	0.108552	0.107059	0.106937	0.105492	0.10403	0.101123	0.0983151	0.0972038	0.0985971	0.0973122	0.0968673	0.0955135	0.0944459	0.0936124	0.0919105	0.0912784	0.091147	0.091179	0.0908729
38	co_3_3	CO3c3	Copahue	Chile	lava	1.52095	0.446247	11.5	11.55	2.81	20	40	uni_CO3_3_d.txt	0.111919	0.116336	0.104067	0.122077	0.0945773	0.122226	0.118595	0.107357	0.10827	0.106411	0.114755	0.117138	0.121336	0.121727	0.120842	0.11736	0.115472	0.122125	0.115097	0.113663	0.112391	0.112656	0.110121	0.109782	0.109667	0.107953	0.107092	0.106079	0.105662	0.105651	0.104929	0.102498	0.102868	0.102575	0.102051	0.103044
39	co_4_1	CO4c1	Copahue	Chile	lava	2.40151	0.134167	51.3	51.33	15.14	20	40	uni_CO4_1_d.txt	0.136692	0.133209	0.14149	0.133826	0.121692	0.133631	0.138283	0.133743	0.131777	0.13818	0.14105	0.145274	0.145986	0.151749	0.15623	0.154666	0.159062	0.159561	0.159501	0.161289	0.159475	0.160961	0.159273	0.159647	0.159211	0.158896	0.158409	0.157807	0.159487	0.157403	0.158773	0.158279	0.15797	0.158032	0.158487	0.159503
40	co_4_2	CO4c2	Copahue	Chile	lava	2.18235	0.208574	27.6	27.59	10.13	20	40	uni_CO4_2_d.txt	0.147259	0.129741	0.14395	0.137366	0.129764	0.148696	0.153847	0.151247	0.149349	0.164691	0.171464	0.175546	0.178576	0.180303	0.186754	0.190838	0.192244	0.193112	0.195331	0.198321	0.196215	0.198045	0.199947	0.199836	0.198703	0.200868	0.199372	0.199216	0.200589	0.200627	0.20135	0.200031	0.201332	0.201337	0.20098	0.201969
41	co_4_3	CO4c3	Copahue	Chile	lava	2.36788	0.146131	56.3	56.28	18.50	20	40	uni_CO4_3_d.txt	0.125729	0.122191	0.12547	0.129715	0.110279	0.146219	0.154659	0.134171	0.152876	0.164775	0.163938	0.180712	0.177554	0.180853	0.188363	0.190387	0.187039	0.191226	0.186152	0.186813	0.187102	0.184357	0.186789	0.184758	0.1818	0.184142	0.181617	0.181345	0.18293	0.181412	0.181651	0.182595	0.179938	0.18187	0.182179	0.180798
42	co_5_1	CO5c1	Copahue	Chile	lava	2.38341	0.108735	55.2	55.22	13.84	20	40	uni_CO5_1_d.txt	0.165407	0.151809	0.132645	0.142162	0.146438	0.151194	0.131117	0.125564	0.130049	0.134391	0.133042	0.131353	0.12901	0.132671	0.12975	0.127624	0.13299	0.131142	0.129683	0.127827	0.127531	0.127874	0.127546	0.125476	0.125218	0.125168	0.124198	0.122837	0.123522	0.124094	0.123191	0.12295	0.122899	0.123441	0.125338	0.126799
43	co_5_2	CO5c2	Copahue	Chile	lava	2.33	0.123458	72.8	72.81	19.84	20	40	uni_CO5_2_d.txt	0.151337	0.154415	0.145805	0.147546	0.159729	0.1448	0.139969	0.14119	0.12601	0.122247	0.129581	0.122873	0.12276	0.128825	0.127615	0.127836	0.130581	0.131603	0.128825	0.130181	0.133949	0.133864	0.132033	0.13086	0.130681	0.13173	0.130769	0.130201	0.129947	0.13048	0.130077	0.130432	0.131036	0.132839	0.133691	0.135046
44	co_5_3	CO5c3	Copahue	Chile	lava	2.43806	0.0885732	62.2	62.17	19.07	20	40	uni_CO5_3_d.txt	0.156671	0.148597	0.159502	0.143496	0.152763	0.15	0.140264	0.136384	0.12605	0.123231	0.1234	0.121626	0.122118	0.125355	0.123537	0.122741	0.125468	0.126148	0.124027	0.126998	0.128088	0.126322	0.126511	0.125057	0.126104	0.125963	0.125173	0.126231	0.125449	0.12556	0.125221	0.124682	0.126045	0.126331	0.127972	0.12874
45	co_6_1	CO6c1	Copahue	Chile	lava	2.03867	0.159668	22.7	22.71	3.67	20	40	uni_CO6_1_d.txt	0.169794	0.162645	0.168049	0.175348	0.175272	0.192738	0.17855	0.200732	0.202045	0.2169	0.231268	0.249015	0.271174	0.292466	0.307227	0.330891	0.349086	0.374307	0.392439	0.412701	0.432279	0.444541	0.458388	0.469333	0.472257	0.48338	0.491012	0.49418	0.499869	0.499618	0.508598	0.509915	0.511496	0.514475	0.515978	0.518423
46	co_6_2	CO6c2	Copahue	Chile	lava	2.04552	0.152337	34.2	34.25	6.82	20	40	uni_CO6_2_d.txt	0.161387	0.159121	0.154845	0.160113	0.17554	0.169915	0.177136	0.18007	0.197895	0.220568	0.238557	0.252324	0.268841	0.286671	0.308175	0.330081	0.350001	0.374421	0.394504	0.417078	0.435945	0.452011	0.462865	0.470593	0.477521	0.48886	0.490949	0.500193	0.506	0.509327	0.513996	0.517188	0.518815	0.522114	0.523296	0.523075
47	co_7_1	CO7c1	Copahue	Chile	lava	2.2416	0.0806789	62.4	62.37	14.97	20	40	uni_CO7_1_d.txt	0.129916	0.160996	0.130336	0.150872	0.142031	0.15995	0.155383	0.164192	0.174274	0.184251	0.191743	0.199617	0.213065	0.223291	0.232433	0.240051	0.24498	0.251366	0.262621	0.264638	0.269711	0.269169	0.273022	0.275303	0.276204	0.276378	0.2763	0.278486	0.277577	0.276871	0.278715	0.278236	0.277263	0.277917	0.277534	0.276699
48	co_7_2	CO7c2	Copahue	Chile	lava	2.22553	0.104533	54.7	54.75	16.02	20	40	uni_CO7_2_d.txt	0.149785	0.166382	0.154935	0.158328	0.150959	0.157227	0.165888	0.173189	0.174935	0.172284	0.18343	0.192001	0.204077	0.212882	0.219721	0.232134	0.239477	0.242974	0.254162	0.258975	0.262101	0.265744	0.268878	0.270192	0.274889	0.273355	0.274133	0.275892	0.276781	0.276367	0.278399	0.278621	0.277987	0.277777	0.278169	0.279236
49	co_7_3	CO7c3	Copahue	Chile	lava	2.21538	0.107239	68.1	68.08	11.53	20	40	uni_CO7_3_d.txt	0.1385	0.160222	0.130068	0.152518	0.164862	0.158311	0.165848	0.170957	0.172384	0.186564	0.186214	0.200694	0.212246	0.221784	0.22986	0.23932	0.249695	0.261816	0.270119	0.273923	0.278737	0.280136	0.286689	0.287917	0.289399	0.289387	0.290363	0.293028	0.291747	0.293282	0.294213	0.294468	0.294649	0.295022	0.294865	0.294394
50	co_7_4	CO7c4	Copahue	Chile	lava	2.22638	0.100055	69.5	69.49	12.05	20	40	uni_CO7_4_d_bis.txt	0.119276	0.138008	0.12846	0.117143	0.147144	0.160127	0.154307	0.172527	0.171596	0.185755	0.192355	0.208658	0.220902	0.236157	0.245116	0.252014	0.260634	0.268629	0.275923	0.281406	0.2846	0.287829	0.29094	0.292552	0.293697	0.295255	0.297182	0.299365	0.298028	0.297761	0.299359	0.299901	0.299664	0.3009	0.300153	0.301027
51	co_8_1	CO8c1	Copahue	Chile	lava	1.45441	0.423301	13.5	13.49	3.13	20	40	uni_CO8_1_d.txt	0.0667162	0.0928996	0.0785207	0.0753714	0.065174	0.0907201	0.0728917	0.0741513	0.078815	0.0919726	0.0849677	0.0839762	0.0881994	0.0866562	0.0865115	0.0935934	0.0924968	0.0973688	0.0915597	0.0900944	0.09198	0.0905016	0.0893602	0.0922832	0.0887948	0.0880642	0.088259	0.0892671	0.087646	0.0878279	0.0880408	0.088125	0.0873997	0.0882639	0.088668	0.0895316
52	co_8_2	CO8c2	Copahue	Chile	lava	1.59626	0.384977	11.4	11.43	5.06	20	40	uni_CO8_2_d.txt	0.0753192	0.087685	0.0894054	0.0817489	0.0771053	0.0929788	0.0830488	0.0867471	0.0897911	0.088152	0.092953	0.0901716	0.0909317	0.0916154	0.0909318	0.094046	0.0972803	0.0941798	0.0949947	0.0963828	0.0977765	0.098079	0.0960595	0.0971396	0.0959134	0.0948271	0.0937279	0.0942478	0.0944143	0.0947402	0.093784	0.0937428	0.0931079	0.0942629	0.0938473	0.0947304
53	co_8_3	CO8c3	Copahue	Chile	lava	1.69365	0.345646	18.6	18.55	5.06	20	40	uni_CO8_3_d.txt	0.085799	0.115202	0.0885028	0.0771951	0.078959	0.0959335	0.0891032	0.0874334	0.0905036	0.0881751	0.0965577	0.0895715	0.092382	0.0894034	0.0922824	0.0970438	0.0965923	0.0960955	0.0939205	0.0940347	0.0946813	0.0944488	0.0936697	0.0939159	0.0925025	0.0916131	0.0917902	0.0924914	0.0908122	0.0911539	0.0909203	0.0899623	0.0911197	0.0912366	0.091435	0.0921681
54	co_8_4	CO8c4	Copahue	Chile	lava	1.78165	0.319565	25.1	25.12	10.49	20	40	uni_CO8_4_d.txt	0.0842271	0.112364	0.0828241	0.0905913	0.10285	0.105861	0.108932	0.101568	0.101278	0.0976958	0.102382	0.0974554	0.0952706	0.0959931	0.0989005	0.0967997	0.100151	0.104436	0.105841	0.105198	0.10578	0.106144	0.106197	0.106903	0.102359	0.103825	0.103494	0.105015	0.103466	0.102922	0.103784	0.104497	0.104645	0.104357	0.105083	0.106236
55	co_9_1	CO9c1	Copahue	Chile	lava	1.49847	0.449532	11.5	11.49	5.68	20	40	uni_CO9_1_d.txt	0.163383	0.160203	0.153144	0.146931	0.14882	0.165266	0.163924	0.166759	0.164559	0.173796	0.173338	0.18164	0.185425	0.190741	0.187186	0.193416	0.196429	0.19724	0.201276	0.202594	0.20248	0.202575	0.205465	0.204765	0.205433	0.205019	0.206585	0.208538	0.207258	0.206426	0.207556	0.20908	0.209421	0.210177	0.211826	0.212998
56	co_9_2	CO9c2	Copahue	Chile	lava	1.50935	0.44852	11.4	11.38	2.49	20	40	uni_CO9_2_d.txt	0.149678	0.150506	0.133594	0.133986	0.150998	0.157899	0.165048	0.158824	0.161563	0.173528	0.167736	0.174426	0.178065	0.191024	0.191882	0.194653	0.198954	0.19614	0.20188	0.198265	0.202756	0.204413	0.202709	0.205834	0.203386	0.20287	0.201712	0.202219	0.202212	0.203336	0.205297	0.203938	0.204279	0.205524	0.206032	0.20969
57	co_9_3	CO9c3	Copahue	Chile	lava	1.44055	0.470168	12.3	12.33	3.86	20	40	uni_CO9_3_d.txt	0.137888	0.144819	0.128419	0.161037	0.152797	0.149522	0.173222	0.164592	0.177895	0.194643	0.201701	0.197018	0.20168	0.212744	0.212142	0.218338	0.21679	0.222366	0.221075	0.227791	0.23005	0.228402	0.231259	0.230738	0.233195	0.23384	0.23414	0.236305	0.235544	0.237306	0.238534	0.239131	0.239392	0.24031	0.242416	0.24412
58	co_12_1	CO12c1	Copahue	Chile	lava	1.52425	0.364887	11.4	11.38	5.04	20	40	uni_CO12_1_d.txt	0.0805202	0.0950015	0.0857125	0.0706916	0.0831664	0.105609	0.085434	0.0869239	0.113396	0.121304	0.112633	0.121381	0.123095	0.127328	0.136341	0.142863	0.141917	0.147966	0.14859	0.152645	0.157149	0.16398	0.163047	0.1682	0.169292	0.169822	0.173751	0.175249	0.178369	0.178973	0.182024	0.181058	0.181505	0.181662	0.182718	0.183982
59	co_12_2	CO12c2	Copahue	Chile	lava	1.78031	0.246528	14.8	14.81	4.20	20	40	uni_CO12_2_d.txt	0.162179	0.134458	0.130181	0.142509	0.138714	0.143671	0.140783	0.132084	0.143457	0.144574	0.148442	0.14539	0.147299	0.155574	0.152215	0.163127	0.166571	0.171015	0.177471	0.185745	0.194066	0.201533	0.207639	0.218998	0.224478	0.232357	0.237611	0.242537	0.247093	0.251175	0.254489	0.256521	0.258034	0.259304	0.261159	0.260804
60	co_12_3	CO12c3	Copahue	Chile	lava	1.71971	0.273422	15.8	15.78	5.47	20	40	uni_CO12_3_d.txt	0.144595	0.138698	0.148458	0.150691	0.152996	0.136415	0.140477	0.139583	0.137907	0.133391	0.141593	0.141414	0.143552	0.147928	0.146835	0.154085	0.156405	0.158569	0.16386	0.17084	0.177918	0.182768	0.188503	0.195214	0.201199	0.20438	0.208857	0.212558	0.217225	0.217515	0.221569	0.221302	0.224752	0.224501	0.223821	0.225221
61	co_13_1	CO13c1	Copahue	Chile	lava	2.40508	0.129221	68.7	68.70	15.14	20	40	uni_CO13_1_d.txt	0.133883	0.129732	0.118925	0.132491	0.144706	0.147022	0.160306	0.147471	0.146922	0.145496	0.148287	0.151065	0.156885	0.152818	0.154279	0.155488	0.156545	0.158298	0.151916	0.155387	0.155605	0.15615	0.153146	0.151882	0.151852	0.151686	0.148585	0.149587	0.149419	0.148937	0.149997	0.149649	0.148284	0.14818	0.14744	0.148129
62	co_13_2	CO13c2	Copahue	Chile	lava	2.42707	0.121058	55.1	55.08	11.92	20	40	uni_CO13_2_d.txt	0.159398	0.14692	0.143187	0.142897	0.16046	0.147419	0.165795	0.147641	0.144909	0.154588	0.153781	0.150497	0.154813	0.159356	0.154593	0.156295	0.15531	0.157481	0.15525	0.154075	0.152436	0.155664	0.150212	0.150211	0.149697	0.14908	0.147965	0.147479	0.146639	0.147459	0.146919	0.146203	0.144701	0.145222	0.144733	0.144324
63	co_13_3	CO13c3	Copahue	Chile	lava	2.31901	0.155985	25	24.74	6.22	20	40	uni_CO13_3_d.txt	0.139352	0.140772	0.129137	0.135421	0.134029	0.12995	0.140316	0.127175	0.129514	0.137453	0.138552	0.137489	0.137897	0.141599	0.143135	0.145677	0.140242	0.138836	0.143685	0.14183	0.142144	0.141508	0.139389	0.138866	0.135786	0.137802	0.136735	0.136608	0.137383	0.135032	0.136846	0.134267	0.134788	0.134539	0.13315	0.133935
64	ls_H2A_7	H2Ac7	La Soufriere	France	lava	2.31527	0.17	66.3	66.26	26.94	20	40	uni_H2A_7w.txt	0.496774	0.503589	0.463832	0.422556	0.40546	0.430475	0.401044	0.360556	0.354752	0.324128	0.33113	0.311695	0.320745	0.316793	0.308622	0.301768	0.307638	0.306086	0.309671	0.298709	0.299562	0.298074	0.297495	0.295089	0.293984	0.293447	0.293961	0.296639	0.292542	0.29003	0.292376	0.29217	0.290442	0.291132	0.29124	0.293148
65	ls_H2A_10	H2Ac10	La Soufriere	France	lava	2.3239	0.16	59.9	59.90	21.77	20	40	uni_H2A_10w.txt	0.369448	0.383297	0.377558	0.383919	0.348385	0.332598	0.344962	0.302396	0.307386	0.308724	0.299902	0.288741	0.288753	0.288736	0.284821	0.285501	0.278474	0.27539	0.278222	0.2771	0.275383	0.278111	0.276873	0.271485	0.274261	0.270782	0.27469	0.274682	0.270776	0.272178	0.270978	0.270252	0.27399	0.272826	0.274442	0.274576
66	ls_H2A_14	H2Ac14	La Soufriere	France	lava	2.18567	0.2	40.7	40.65	17.85	20	40	uni_H2A_14w.txt	0.274838	0.297349	0.287512	0.243	0.24252	0.243226	0.270426	0.26433	0.249967	0.261421	0.253903	0.258159	0.258391	0.260453	0.262127	0.26362	0.26104	0.266494	0.265376	0.263634	0.267925	0.270722	0.266236	0.270748	0.268806	0.269622	0.268191	0.272107	0.268582	0.27137	0.272738	0.271532	0.272616	0.275861	0.27811	0.281083
67	ls_H2B_9	H2Bc9	La Soufriere	France	lava	1.36305	0.47	2	2.03	0.73	20	40	uni_H2B_9w.txt	0.394584	0.418895	0.370631	0.396702	0.37205	0.369747	0.357421	0.35334	0.34432	0.359765	0.354529	0.366309	0.371833	0.374267	0.375575	0.389574	0.39633	0.408853	0.418347	0.427637	0.432991	0.442516	0.449792	0.451761	0.454251	0.456022	0.457267	0.46241	0.464892	0.466621	0.470321	0.47513	0.48003	0.487242	0.495471	0.502633
68	ls_H2B_13	H2Bc13	La Soufriere	France	lava	1.40612	0.44	2.4	2.37	0.80	20	40	uni_H2B_13w.txt	0.35983	0.410887	0.378671	0.394654	0.377412	0.386832	0.376864	0.376928	0.389583	0.384283	0.396467	0.397919	0.408926	0.415042	0.423206	0.431293	0.44012	0.451692	0.457836	0.470879	0.479085	0.483944	0.491247	0.497118	0.50055	0.500536	0.504498	0.504297	0.509487	0.512775	0.516305	0.52129	0.526781	0.533377	0.540346	0.54893
69	ls_H3_15	H3c15	La Soufriere	France	lava	2.28352	0.15	59	59.03	25.75	20	40	uni_H3_15w.txt	0.291222	0.28793	0.30097	0.285334	0.283696	0.27421	0.27605	0.259807	0.261513	0.266966	0.265243	0.262753	0.266807	0.270993	0.270369	0.275197	0.26919	0.267741	0.269594	0.270684	0.269992	0.273076	0.273487	0.273842	0.273587	0.272988	0.272215	0.273246	0.272388	0.271513	0.271228	0.271999	0.272491	0.272733	0.271835	0.273238
70	ls_H4A_2	H4Ac2	La Soufriere	France	lava	1.95773	0.23	40.3	40.28	10.40	20	40	uni_H4A_2d.txt	0.338329	0.315831	0.318458	0.303892	0.311241	0.332305	0.324911	0.329788	0.338859	0.344733	0.359434	0.358564	0.370143	0.374157	0.379378	0.384667	0.384237	0.393403	0.398049	0.402959	0.404496	0.408735	0.407713	0.412586	0.413139	0.413844	0.415687	0.417441	0.417515	0.418832	0.420256	0.420942	0.424652	0.427348	0.427095	0.430106
71	ls_H4A_5	H4Ac5	La Soufriere	France	lava	1.94237	0.25	22.9	22.88	7.62	20	40	uni_H4A_5w.txt	0.247971	0.260165	0.243415	0.269964	0.259	0.26813	0.27451	0.270809	0.283528	0.282599	0.284865	0.285746	0.293472	0.295777	0.296213	0.304128	0.311636	0.305791	0.314052	0.31873	0.319306	0.322472	0.327858	0.325306	0.326227	0.329044	0.32852	0.33099	0.333398	0.330716	0.333782	0.337117	0.337528	0.338651	0.343418	0.345801
72	ls_H4A_7	H4Ac7	La Soufriere	France	lava	1.93638	0.26	23.3	23.30	8.45	20	40	uni_H4A_7w.txt	0.224613	0.240431	0.223489	0.221828	0.231662	0.230637	0.223599	0.217619	0.232211	0.232901	0.244265	0.242136	0.24791	0.26118	0.261863	0.256814	0.262435	0.266836	0.26788	0.27272	0.279529	0.282638	0.285816	0.284567	0.286852	0.28939	0.287934	0.290016	0.290597	0.292294	0.293618	0.296564	0.298094	0.302755	0.3054	0.310312
73	ls_H4A_8	H4Ac8	La Soufriere	France	lava	1.98453	0.23	37.2	37.23	9.31	20	40	uni_H4A_8d.txt	0.525373	0.479711	0.470174	0.444332	0.441351	0.453478	0.431507	0.397429	0.379865	0.387386	0.391994	0.383659	0.383447	0.376737	0.371536	0.37093	0.372167	0.375349	0.372472	0.373547	0.371514	0.373052	0.371336	0.372481	0.373231	0.375284	0.374599	0.373659	0.371265	0.375296	0.374469	0.376386	0.37704	0.378907	0.380869	0.382801
74	ls_H4A_10	H4Ac10	La Soufriere	France	lava	1.96245	0.24	22	21.95	7.94	20	40	uni_H4A_10w.txt	0.498437	0.469492	0.47926	0.463465	0.418308	0.416634	0.399616	0.382461	0.381193	0.367806	0.368684	0.355409	0.360736	0.357804	0.350835	0.354257	0.346698	0.349055	0.350476	0.35038	0.349666	0.3502	0.349287	0.34842	0.350744	0.351226	0.351901	0.352754	0.351885	0.350812	0.350567	0.35203	0.352681	0.356568	0.3575	0.360067
75	ls_H5A_2	H5Ac2	La Soufriere	France	lava	2.23463	0.16	88.3	88.32	27.29	20	40	uni_H5A_2d.txt	0.507326	0.49927	0.498662	0.483394	0.458352	0.47723	0.448003	0.417339	0.422052	0.418736	0.41748	0.40905	0.404461	0.404255	0.400509	0.405442	0.403142	0.403481	0.402139	0.398943	0.402583	0.399957	0.399084	0.399898	0.400446	0.403886	0.401909	0.401409	0.403256	0.403482	0.403632	0.402655	0.405067	0.406209	0.40636	0.409284
76	ls_H5A_4	H5Ac4	La Soufriere	France	lava	2.0937	0.2	48.8	48.78	19.58	20	40	uni_H5A_4w.txt	0.528787	0.496013	0.481909	0.470814	0.436987	0.442165	0.411458	0.398125	0.389303	0.364253	0.364841	0.35687	0.36862	0.365111	0.355221	0.360863	0.354867	0.353344	0.353979	0.35283	0.350903	0.352968	0.351345	0.352925	0.353577	0.351971	0.35164	0.349936	0.352675	0.352519	0.355109	0.352637	0.354402	0.358885	0.359529	0.360559
77	ls_H5A_5	H5Ac5	La Soufriere	France	lava	2.19636	0.16	83.9	83.91	23.27	20	40	uni_H5A_5d.txt	0.560839	0.561028	0.501724	0.495214	0.46215	0.452141	0.408257	0.375816	0.377973	0.352444	0.351807	0.340167	0.345475	0.337449	0.327422	0.333689	0.32291	0.323886	0.316971	0.313445	0.314548	0.311528	0.309873	0.3095	0.311349	0.311088	0.30906	0.308374	0.306799	0.308303	0.305858	0.304415	0.306498	0.30762	0.308156	0.309423
78	ls_H5A_9	H5Ac9	La Soufriere	France	lava	2.20015	0.15	64.5	64.51	23.18	20	40	uni_H5A_9w.txt	0.547005	0.582647	0.526755	0.526561	0.505143	0.493455	0.460921	0.451938	0.440129	0.420458	0.417137	0.406113	0.406011	0.411944	0.398172	0.403389	0.404282	0.40774	0.403714	0.400124	0.402222	0.404067	0.403403	0.402395	0.402889	0.402455	0.402627	0.402657	0.401908	0.401842	0.403912	0.403764	0.406819	0.407448	0.41079	0.413738
79	ls_H6_2	H6c2	La Soufriere	France	lava	2.17747	0.16	45.5	45.51	14.31	20	40	uni_H6_2w.txt	0.604993	0.611843	0.555515	0.560327	0.528276	0.539132	0.505296	0.47926	0.476508	0.457397	0.456095	0.441104	0.450489	0.453167	0.444644	0.451236	0.448655	0.448735	0.45408	0.44921	0.451982	0.450846	0.448569	0.45036	0.452457	0.449443	0.449088	0.451214	0.451907	0.450773	0.451063	0.451131	0.452366	0.454352	0.456334	0.458196
80	ls_H6_3	H6c3	La Soufriere	France	lava	2.10582	0.2	39.2	39.16	11.02	20	40	uni_H6_3w.txt	0.443301	0.410736	0.365332	0.398456	0.394685	0.381038	0.341078	0.338306	0.338885	0.329281	0.337031	0.341208	0.337108	0.349521	0.346633	0.347988	0.341004	0.345695	0.344864	0.348474	0.345953	0.346614	0.346862	0.347853	0.348213	0.344864	0.344674	0.345802	0.348035	0.346349	0.348024	0.347871	0.348274	0.350915	0.350857	0.353917
81	ls_H6_10	H6c10	La Soufriere	France	lava	2.11039	0.18	53	53.05	12.98	20	40	uni_H6_10d.txt	0.341676	0.363212	0.312411	0.354849	0.309542	0.288767	0.305927	0.260626	0.249569	0.235957	0.230436	0.241851	0.231278	0.218734	0.232711	0.228182	0.223185	0.230415	0.227171	0.226886	0.228179	0.227311	0.227056	0.229029	0.234192	0.228717	0.227955	0.229505	0.225769	0.228526	0.230394	0.232261	0.233753	0.237351	0.239485	0.243147
82	ls_H6_13	H6c13	La Soufriere	France	lava	2.15939	0.18	63	62.96	18.33	20	40	uni_H6_13d.txt	0.392483	0.37943	0.377924	0.403718	0.421794	0.377073	0.368141	0.349614	0.353369	0.344916	0.353074	0.353929	0.356932	0.368241	0.357895	0.373931	0.369838	0.375347	0.37911	0.379575	0.382705	0.380014	0.379713	0.380626	0.382371	0.380178	0.379593	0.385045	0.383782	0.381323	0.385987	0.386625	0.387241	0.388287	0.392438	0.394121
83	ls_H14_7	H14c7	La Soufriere	France	lava	2.3648	0.15	104.4	104.37	27.06	20	40	uni_H14_7w.txt	0.38021	0.408651	0.363911	0.368386	0.356161	0.342201	0.309089	0.309859	0.29895	0.283417	0.286014	0.288421	0.293327	0.294381	0.288208	0.283735	0.281374	0.280449	0.273882	0.271079	0.270986	0.269166	0.269634	0.265521	0.26579	0.263137	0.25985	0.262843	0.259954	0.26208	0.260393	0.25893	0.260171	0.260491	0.260132	0.259008
84	ls_H14_8	H14c8	La Soufriere	France	lava	2.24784	0.2	12.5	12.48	9.49	20	40	uni_H14_8w.txt	0.383744	0.369672	0.374527	0.333758	0.315203	0.304585	0.282924	0.276364	0.265603	0.249951	0.256388	0.250411	0.246368	0.246597	0.245564	0.248352	0.242	0.237533	0.23296	0.231961	0.23053	0.228833	0.227614	0.225393	0.225721	0.220384	0.216833	0.220023	0.218988	0.21737	0.218902	0.216278	0.216264	0.215472	0.217178	0.21687
85	ls_H14_11	H14c11	La Soufriere	France	lava	2.30053	0.18	40.7	40.68	10.75	20	40	uni_H14_11w.txt	0.486654	0.495314	0.416614	0.433431	0.410021	0.366277	0.332715	0.308866	0.294599	0.266163	0.277689	0.256477	0.250439	0.262347	0.25043	0.244311	0.248265	0.240771	0.234109	0.228633	0.227152	0.224386	0.226083	0.219305	0.219262	0.216402	0.214522	0.214131	0.210668	0.209151	0.209909	0.209551	0.208525	0.208062	0.208838	0.21223
86	ls_H15_6	H15c6	La Soufriere	France	lava	1.99109	0.27	17.3	17.33	8.44	20	40	uni_H15_6w.txt	0.381211	0.385674	0.3659	0.407825	0.331976	0.335843	0.294687	0.284251	0.272197	0.271877	0.249385	0.272723	0.271679	0.271323	0.267887	0.274122	0.26997	0.27593	0.278081	0.27482	0.275221	0.283167	0.277812	0.285307	0.278094	0.28074	0.28086	0.282728	0.280701	0.281464	0.281445	0.285541	0.287072	0.28767	0.29125	0.293964
87	ls_H15_7	H15c7	La Soufriere	France	lava	1.99117	0.25	12.7	12.66	8.34	20	40	uni_H15_7w.txt	0.355824	0.39049	0.335735	0.335267	0.327044	0.334919	0.327628	0.323286	0.323625	0.323729	0.319183	0.340211	0.354291	0.352887	0.357249	0.360012	0.355058	0.364408	0.37398	0.377418	0.378421	0.381486	0.380673	0.382767	0.381745	0.381963	0.382908	0.384498	0.384909	0.386023	0.385325	0.38937	0.392445	0.394243	0.398544	0.402246
88	ls_H18_14	H18c14	La Soufriere	France	lava	2.43316	0.12	94.7	94.68	35.35	20	40	uni_H18_14w.txt	0.350722	0.348435	0.352639	0.365106	0.359424	0.342818	0.331671	0.333572	0.319068	0.31596	0.319541	0.323674	0.327573	0.329868	0.321308	0.314706	0.316035	0.314516	0.314969	0.316534	0.310063	0.308381	0.305384	0.308313	0.304963	0.305095	0.307102	0.302575	0.301952	0.305292	0.302828	0.305253	0.305705	0.305516	0.304203	0.304941
89	ls_H19_3	H19c3	La Soufriere	France	lava	2.01151	0.21	39.7	39.73	13.60	20	40	uni_H19_3d.txt	0.388921	0.384484	0.379807	0.353279	0.368526	0.376983	0.342612	0.366015	0.360029	0.36047	0.363515	0.379602	0.391199	0.390498	0.391789	0.39944	0.397436	0.409165	0.408751	0.412115	0.41534	0.416677	0.415581	0.411967	0.412331	0.410882	0.415235	0.413059	0.41473	0.413049	0.414642	0.415646	0.416212	0.420032	0.421479	0.423238
90	ls_H19_5	H19c5	La Soufriere	France	lava	2.21485	0.17	54.3	54.31	23.89	20	40	uni_H19_5w.txt	0.357097	0.380539	0.34492	0.343769	0.339013	0.345511	0.310343	0.295333	0.294753	0.289815	0.290099	0.281955	0.285837	0.289854	0.288845	0.286833	0.287225	0.287468	0.290856	0.292417	0.291587	0.290283	0.28833	0.287158	0.28709	0.286984	0.284188	0.282903	0.283701	0.283253	0.281585	0.283444	0.283347	0.283809	0.288135	0.288776
91	ls_H19_8	H19c8	La Soufriere	France	lava	2.03065	0.22	47.4	47.40	15.80	20	40	uni_H19_8d.txt	0.422596	0.436696	0.411811	0.399491	0.4014	0.3786	0.366305	0.370782	0.361263	0.358269	0.361701	0.367457	0.376785	0.377269	0.378892	0.37601	0.378592	0.382951	0.379775	0.383324	0.38034	0.384505	0.38105	0.379311	0.379166	0.378381	0.375629	0.375354	0.374157	0.376645	0.376436	0.378941	0.379568	0.381301	0.384224	0.386878
92	ls_H19_9	H19c9	La Soufriere	France	lava	2.00817	0.22	34.1	34.05	13.99	20	40	uni_H19_9d.txt	0.398213	0.396932	0.407054	0.365529	0.376083	0.365039	0.367022	0.350477	0.361925	0.357836	0.360943	0.361719	0.36341	0.36762	0.36373	0.364359	0.361945	0.361088	0.365504	0.371544	0.367915	0.370674	0.364864	0.367284	0.366295	0.365612	0.363336	0.364154	0.364752	0.364334	0.364666	0.367003	0.367686	0.369241	0.371668	0.374722
93	ls_H19_12	H19c12	La Soufriere	France	lava	2.07566	0.204229	41.2	41.21	18.91	20	40	uni_H19_12d.txt	0.631591	0.597299	0.596988	0.558192	0.557545	0.514344	0.470876	0.465137	0.425332	0.400073	0.369408	0.385673	0.380809	0.373336	0.364907	0.35229	0.356974	0.357802	0.358371	0.3514	0.350927	0.349816	0.352366	0.346752	0.349317	0.343809	0.343521	0.342656	0.340868	0.343146	0.341917	0.343902	0.346653	0.347908	0.353044	0.355564
94	ls_H19_13	H19c13	La Soufriere	France	lava	2.10687	0.195383	44.5	44.46	16.57	20	40	uni_H19_13w_bis.txt	0.270274	0.229286	0.276373	0.299285	0.294079	0.241403	0.276318	0.269044	0.275467	0.287782	0.295091	0.304098	0.312889	0.31034	0.310778	0.315639	0.31604	0.321441	0.324924	0.32889	0.326627	0.323809	0.324248	0.325228	0.324304	0.320996	0.32349	0.323624	0.322639	0.322385	0.322602	0.321833	0.324494	0.327839	0.330443	0.33257
95	ls_H19_14	H19c14	La Soufriere	France	lava	2.21125	0.16767	61.3	61.27	24.21	20	40	uni_H19_14w.txt	0.182176	0.215772	0.226399	0.226988	0.250609	0.226606	0.246427	0.254374	0.251466	0.268558	0.281596	0.281029	0.30007	0.299199	0.300267	0.305848	0.305933	0.31871	0.318477	0.319534	0.32145	0.323445	0.32255	0.322298	0.322955	0.319048	0.323595	0.32144	0.322405	0.322888	0.326288	0.324017	0.330544	0.330063	0.334083	0.336811
96	ls_H19_15	H19c15	La Soufriere	France	lava	1.99252	0.223231	39.6	39.59	14.91	20	40	uni_H19_15d.txt	0.417982	0.426146	0.381057	0.397517	0.376473	0.374541	0.343874	0.343833	0.330056	0.339832	0.330114	0.337533	0.338265	0.347504	0.347264	0.34004	0.339752	0.344912	0.344185	0.34613	0.344841	0.347377	0.343306	0.343032	0.343682	0.340944	0.338353	0.340339	0.340509	0.339802	0.341958	0.342199	0.344741	0.346487	0.349393	0.352843
97	ls_H20_2	H20c2	La Soufriere	France	lava	1.55319	0.37	4.8	4.84	1.25	20	40	uni_H20_2d.txt	0.221436	0.222695	0.213511	0.239899	0.239198	0.26823	0.284343	0.310367	0.331781	0.329911	0.33546	0.354911	0.365206	0.36505	0.370898	0.37472	0.377425	0.381623	0.384773	0.387016	0.386741	0.388116	0.390343	0.390747	0.390588	0.388799	0.388395	0.389141	0.392394	0.39011	0.392863	0.390783	0.392881	0.392637	0.393414	0.39371
98	ls_H20_3	H20c3	La Soufriere	France	lava	1.54629	0.37	4.4	4.43	1.39	20	40	uni_H20_3d.txt	0.179411	0.218386	0.220748	0.22689	0.257217	0.272158	0.27872	0.296017	0.321463	0.327928	0.33864	0.352607	0.366612	0.370694	0.373078	0.375722	0.380441	0.392733	0.393976	0.394425	0.398799	0.400001	0.400642	0.401215	0.398811	0.399911	0.39927	0.400835	0.402659	0.401916	0.402202	0.405236	0.404734	0.406832	0.406058	0.407086
99	ls_H20_5	H20c5	La Soufriere	France	lava	1.48746	0.393556	3.9	3.88	0.89	20	40	uni_H20_5w.txt	0.3636	0.377658	0.372188	0.362387	0.369746	0.353957	0.358821	0.351418	0.373019	0.375743	0.37039	0.369606	0.371569	0.372869	0.37551	0.381643	0.375034	0.379631	0.376781	0.377242	0.37907	0.375446	0.373917	0.374096	0.374913	0.373958	0.376669	0.374483	0.375276	0.374291	0.374771	0.374725	0.375116	0.375748	0.37562	0.374768
100	ls_H20_6	H20c6	La Soufriere	France	lava	1.46635	0.399015	3.1	3.10	0.68	20	40	uni_H20_6w.txt	0.355504	0.357122	0.384924	0.361632	0.350577	0.371627	0.36308	0.382264	0.3626	0.382808	0.376298	0.391369	0.382559	0.389267	0.392029	0.395265	0.392944	0.393023	0.390498	0.389645	0.391288	0.387871	0.387378	0.387559	0.387938	0.388882	0.390776	0.388466	0.388851	0.388239	0.389304	0.387689	0.387789	0.388071	0.386674	0.387325
101	ls_H20_7	H20c7	La Soufriere	France	lava	1.55555	0.366864	4.6	4.64	1.32	20	40	uni_H20_7d.txt	0.328029	0.373171	0.342313	0.368992	0.345018	0.35445	0.355722	0.359593	0.37026	0.374653	0.37563	0.383244	0.392628	0.395872	0.389607	0.396092	0.399758	0.407022	0.406185	0.405863	0.404467	0.405546	0.407871	0.40359	0.402551	0.405692	0.405162	0.405045	0.406477	0.402445	0.40694	0.405572	0.407003	0.405796	0.404945	0.405834
102	ls_H20_8	H20c8	La Soufriere	France	lava	1.59299	0.369714	6.1	6.07	1.90	20	40	uni_H20_8d.txt	0.232435	0.261259	0.301403	0.298421	0.317115	0.306911	0.337533	0.358672	0.371239	0.376925	0.386361	0.395409	0.417716	0.406515	0.413185	0.421327	0.420916	0.431875	0.436392	0.44046	0.436562	0.436042	0.436339	0.438122	0.436416	0.442249	0.437802	0.440776	0.441589	0.441314	0.442631	0.44186	0.443638	0.443047	0.444104	0.443528
103	ls_H20_10	H20c10	La Soufriere	France	lava	1.52635	0.373329	3.4	3.43	1.09	20	40	uni_H20_10d.txt	0.190818	0.187682	0.21326	0.213092	0.223442	0.262442	0.280836	0.312651	0.341827	0.345144	0.345579	0.352958	0.372223	0.371231	0.378708	0.378336	0.386668	0.389214	0.393023	0.398292	0.398961	0.399945	0.401514	0.399766	0.396834	0.399179	0.401777	0.401728	0.404981	0.40333	0.404522	0.4052	0.407004	0.407539	0.407708	0.405514
104	ls_H20_11	H20c11	La Soufriere	France	lava	1.63333	0.363115	3.1	3.06	1.04	20	40	uni_H20_11w_bis.txt	0.171011	0.177065	0.17974	0.187077	0.210057	0.22394	0.254917	0.245454	0.286376	0.292157	0.303181	0.311993	0.318503	0.325258	0.335174	0.338344	0.346602	0.341421	0.351701	0.348904	0.352406	0.356817	0.35703	0.356273	0.357892	0.35989	0.357666	0.360019	0.359311	0.361305	0.364055	0.36518	0.365211	0.365936	0.366867	0.367628
105	ls_H21_3	H21c3	La Soufriere	France	lava	2.33953	0.17	90.2	90.21	27.05	20	40	uni_H21_3d.txt	0.307063	0.314414	0.301691	0.307189	0.280123	0.285164	0.258808	0.279235	0.274146	0.28026	0.280558	0.282561	0.289073	0.283033	0.289677	0.28505	0.294924	0.286314	0.287632	0.296648	0.292577	0.287909	0.287627	0.290789	0.289125	0.286341	0.286637	0.288158	0.289983	0.287147	0.290335	0.290762	0.289577	0.289508	0.291414	0.291635
106	ls_H21_4	H21c4	La Soufriere	France	lava	2.28237	0.17	71.3	71.28	19.41	20	40	uni_H21_4w.txt	0.295714	0.271171	0.30442	0.28022	0.275231	0.265769	0.26418	0.276821	0.257944	0.270581	0.270795	0.277906	0.275836	0.274251	0.281041	0.276705	0.281043	0.282168	0.284587	0.286584	0.28705	0.288303	0.29115	0.291606	0.288526	0.283382	0.283944	0.287017	0.288217	0.287887	0.289711	0.289071	0.288564	0.289594	0.290654	0.293458
107	ls_H21_6	H21c6	La Soufriere	France	lava	2.23947	0.18	44.1	44.09	12.61	20	40	uni_H21_6w.txt	0.298177	0.27984	0.296873	0.316285	0.272486	0.272186	0.292411	0.269336	0.264077	0.265299	0.263426	0.262426	0.254327	0.256333	0.254629	0.256803	0.257013	0.254238	0.252974	0.255366	0.25601	0.2529	0.251289	0.253588	0.256753	0.25109	0.249106	0.246764	0.249951	0.246978	0.246696	0.24849	0.246546	0.249018	0.248792	0.251013
108	ls_H21_8	H21c8	La Soufriere	France	lava	2.28479	0.16	65.2	65.17	18.05	20	40	uni_H21_8d.txt	0.302788	0.307819	0.299274	0.308033	0.287614	0.289241	0.281863	0.265312	0.270793	0.268739	0.265944	0.281761	0.269414	0.27908	0.275006	0.271545	0.269344	0.268797	0.274548	0.269527	0.268064	0.269426	0.270987	0.269042	0.268357	0.265449	0.263263	0.265753	0.26693	0.265556	0.264747	0.266212	0.266759	0.266104	0.26666	0.268487
109	ls_H21_11	H21c11	La Soufriere	France	lava	2.3435	0.16036	86.9408	86.94	25.91	20	40	uni_H21_11d.txt	0.349885	0.34496	0.337781	0.329839	0.304106	0.288447	0.30792	0.298868	0.305256	0.30195	0.318473	0.32151	0.317812	0.32313	0.31791	0.325044	0.328949	0.324018	0.327591	0.328049	0.32598	0.325772	0.325724	0.32641	0.325306	0.325257	0.323571	0.324086	0.32392	0.324831	0.323193	0.321641	0.323974	0.323438	0.32448	0.324178
110	ls_H21_12	H21c12	La Soufriere	France	lava	2.2342	0.162181	73.8321	73.83	20.06	20	40	uni_H21_12d.txt	0.380103	0.326649	0.368756	0.350207	0.370049	0.324523	0.345616	0.332203	0.329679	0.353493	0.361909	0.362483	0.365021	0.369777	0.366031	0.369859	0.367841	0.364532	0.368997	0.36242	0.365625	0.36222	0.361555	0.35609	0.356398	0.353212	0.353451	0.357613	0.352959	0.354309	0.353172	0.353241	0.353146	0.355508	0.355089	0.357116
111	ls_H21_13	H21c13	La Soufriere	France	lava	2.26294	0.16066	87.241	87.24	21.16	20	40	uni_H21_13d.txt	0.409325	0.419381	0.408177	0.37338	0.388182	0.385265	0.359018	0.354146	0.330364	0.325477	0.323887	0.319755	0.326185	0.316711	0.314148	0.31916	0.309763	0.315457	0.313887	0.310922	0.312514	0.311783	0.312099	0.310525	0.309811	0.308208	0.308383	0.31171	0.307216	0.309031	0.306854	0.308212	0.308565	0.308127	0.30792	0.309587
112	ls_H21_15	H21c15	La Soufriere	France	lava	2.28436	0.17	55.8	55.78	17.73	20	40	uni_H21_15w.txt	0.433865	0.451712	0.4547	0.430876	0.408596	0.407541	0.393239	0.377751	0.362174	0.360494	0.352113	0.354346	0.352986	0.362609	0.354169	0.346202	0.34666	0.34792	0.344476	0.347872	0.341701	0.343321	0.34149	0.337542	0.339853	0.340705	0.336789	0.338455	0.339455	0.337722	0.336481	0.335188	0.336121	0.33659	0.337382	0.337567
113	ls_H22_2	H22c2	La Soufriere	France	lava	2.48072	0.12	145.7	145.72	29.77	20	40	uni_H22_2d.txt	0.427589	0.451884	0.463619	0.45732	0.448319	0.479129	0.499521	0.473178	0.48117	0.509383	0.514402	0.540037	0.538832	0.536967	0.550951	0.555434	0.566556	0.570583	0.565373	0.573922	0.577911	0.577449	0.575227	0.581494	0.579936	0.583026	0.584893	0.587706	0.588232	0.585784	0.589148	0.592936	0.594022	0.593401	0.595224	0.594733
114	ls_H22_6	H22c6	La Soufriere	France	lava	2.49684	0.12	133.6	133.63	32.22	20	40	uni_H22_6d.txt	0.42047	0.394552	0.447747	0.431924	0.448442	0.468777	0.484334	0.469947	0.485448	0.493759	0.508484	0.529169	0.538278	0.542945	0.54654	0.549985	0.551403	0.562535	0.564193	0.563564	0.565166	0.565065	0.56767	0.567452	0.56975	0.567746	0.568098	0.575215	0.574044	0.574322	0.576408	0.580577	0.581495	0.58337	0.582817	0.584229
115	ls_H22_7	H22c7	La Soufriere	France	lava	2.49858	0.12	119.6	119.56	26.29	20	40	uni_H22_7w.txt	0.420652	0.431856	0.445459	0.432565	0.376856	0.428357	0.41568	0.37593	0.379574	0.381474	0.381111	0.395261	0.402698	0.401815	0.4061	0.40958	0.401232	0.406046	0.419209	0.420722	0.414916	0.418019	0.419675	0.417514	0.413787	0.417454	0.417749	0.420117	0.422024	0.422623	0.421975	0.425639	0.423831	0.425233	0.423682	0.42537
116	ls_H22_14	H22c14	La Soufriere	France	lava	2.46721	0.12	131.3	131.27	24.91	20	40	uni_H22_14w.txt	0.466857	0.429647	0.440878	0.418098	0.402757	0.418427	0.410666	0.38495	0.37166	0.393716	0.388321	0.40323	0.395307	0.402167	0.408071	0.405615	0.396706	0.405984	0.402823	0.398783	0.400935	0.398953	0.39634	0.403159	0.398611	0.39852	0.398838	0.399185	0.399511	0.401993	0.400048	0.397878	0.399963	0.400252	0.398946	0.399118
117	ls_H22_15	H22c15	La Soufriere	France	lava	2.48522	0.13	113.6	113.62	22.03	20	40	uni_H22_15w.txt	0.615972	0.583886	0.565901	0.5264	0.532233	0.501043	0.502401	0.471856	0.478086	0.471832	0.479629	0.479441	0.481702	0.47747	0.483899	0.493939	0.488196	0.48486	0.482011	0.483147	0.481462	0.478102	0.477789	0.481007	0.480059	0.478853	0.47954	0.481008	0.479392	0.4784	0.4782	0.479654	0.478024	0.480303	0.479153	0.481526
118	ls_H25_3	H25c3	La Soufriere	France	lava	2.13582	0.18	38.2	38.15	18.55	20	40	uni_H25_3w.txt	0.315899	0.385356	0.342996	0.334897	0.322992	0.326355	0.311239	0.302449	0.302144	0.300478	0.29302	0.296219	0.307137	0.299874	0.310339	0.308515	0.306248	0.312429	0.307789	0.316877	0.319088	0.315382	0.317444	0.321652	0.318726	0.318546	0.319459	0.317991	0.317039	0.319229	0.320048	0.321605	0.323293	0.322899	0.3275	0.329718
119	ls_H25_4	H25c4	La Soufriere	France	lava	2.35621	0.14	97.7	97.72	29.64	20	40	uni_H25_4d.txt	0.349655	0.374538	0.34713	0.364564	0.322905	0.318014	0.308797	0.292388	0.308142	0.290037	0.280284	0.286378	0.290453	0.282567	0.281642	0.275183	0.283594	0.283983	0.281219	0.282547	0.280635	0.281471	0.281073	0.282424	0.281298	0.278692	0.278845	0.278187	0.280472	0.277573	0.279048	0.281616	0.280485	0.281898	0.28503	0.288068
120	ls_H25_10	H25c10	La Soufriere	France	lava	2.28505	0.13	72.9	72.89	24.17	20	40	uni_H25_10w.txt	0.32181	0.346134	0.366493	0.336209	0.318722	0.320809	0.302303	0.307804	0.315101	0.291817	0.293397	0.306616	0.305677	0.303233	0.307668	0.31202	0.310613	0.310215	0.309867	0.312673	0.321711	0.314727	0.323728	0.317767	0.317358	0.317935	0.318688	0.315884	0.321278	0.318523	0.317937	0.32075	0.322121	0.324313	0.326314	0.329381
121	ls_H25_14	H25c14	La Soufriere	France	lava	2.29409	0.14	75	75.03	25.19	20	40	uni_H25_14w.txt	0.333646	0.346194	0.366284	0.32474	0.32778	0.312972	0.299767	0.288846	0.294131	0.275945	0.279039	0.286682	0.283846	0.283466	0.288993	0.294781	0.286061	0.293129	0.288204	0.286094	0.290745	0.288176	0.285794	0.287137	0.285198	0.282595	0.282173	0.282368	0.280882	0.282047	0.286679	0.284877	0.284432	0.286536	0.286436	0.289871
122	ls_H29_3	H29c3	La Soufriere	France	lava	2.23269	0.2	59.4	59.39	21.79	20	40	uni_H29_3w.txt	0.379323	0.405335	0.370532	0.353209	0.336214	0.325819	0.297424	0.292825	0.28008	0.270087	0.263655	0.261215	0.260555	0.262608	0.253409	0.263794	0.249418	0.246422	0.24301	0.237215	0.238424	0.232827	0.23822	0.237379	0.23697	0.2324	0.231611	0.234009	0.233035	0.231324	0.231332	0.230763	0.232017	0.230522	0.231651	0.232188
123	ls_H29_6	H29c6	La Soufriere	France	lava	2.05695	0.26	34.8	34.78	15.87	20	40	uni_H29_6w.txt	0.38297	0.382727	0.347761	0.354618	0.329832	0.304216	0.28996	0.262937	0.265016	0.24099	0.228984	0.239067	0.240652	0.234853	0.230103	0.22873	0.229432	0.221938	0.218662	0.214387	0.212625	0.211591	0.208336	0.208664	0.209824	0.206911	0.207339	0.207205	0.205931	0.205324	0.205179	0.205752	0.205337	0.206245	0.205262	0.206166
124	ls_H29_13	H29c13	La Soufriere	France	lava	2.12882	0.23	29.5	29.53	14.18	20	40	uni_H29_13w.txt	0.53858	0.552808	0.496156	0.467018	0.462342	0.415138	0.391499	0.369071	0.348068	0.317838	0.298393	0.289031	0.290587	0.277647	0.266179	0.259829	0.252415	0.249181	0.24244	0.233243	0.230644	0.229737	0.227626	0.224331	0.224804	0.221712	0.223834	0.222877	0.220546	0.221626	0.220527	0.218671	0.219258	0.218201	0.219281	0.2206
125	ls_H29_16	H29c16	La Soufriere	France	lava	2.12066	0.24	50.7	50.73	20.93	20	40	uni_H29_16d.txt	0.517591	0.498755	0.472333	0.450562	0.428461	0.389571	0.376871	0.343086	0.312793	0.294274	0.277766	0.276589	0.274682	0.264873	0.25304	0.24863	0.241503	0.23438	0.227748	0.224259	0.218669	0.219469	0.218782	0.214716	0.213816	0.2133	0.209648	0.210653	0.206998	0.206715	0.207135	0.205098	0.204688	0.204034	0.204471	0.205253
126	ls_H30_1	H30c1	La Soufriere	France	lava	2.24879	0.16	39.1	39.07	19.10	20	40	uni_H30_1w.txt	0.50032	0.463014	0.46392	0.455231	0.449692	0.419556	0.410682	0.371933	0.370648	0.355019	0.354013	0.348394	0.349427	0.338094	0.329687	0.335089	0.334836	0.332493	0.32328	0.32207	0.317409	0.318967	0.316499	0.315145	0.311839	0.311908	0.309496	0.309246	0.309889	0.308488	0.307833	0.307446	0.308159	0.307984	0.309289	0.310626
127	ls_H30_7	H30c7	La Soufriere	France	lava	2.20366	0.17	58.5	58.48	17.81	20	40	uni_H30_7d.txt	0.464859	0.467521	0.446036	0.420349	0.398759	0.389631	0.383274	0.344569	0.34461	0.338985	0.327051	0.336485	0.328345	0.332326	0.319141	0.312204	0.309754	0.309554	0.3045	0.302107	0.298439	0.296841	0.294343	0.292733	0.291463	0.291681	0.291781	0.289288	0.290613	0.288444	0.288301	0.288905	0.287815	0.289044	0.289511	0.290259
128	ls_H32_8	H32c8	La Soufriere	France	lava	2.7563	0.05	194.1						0.50778	0.489441	0.445395	0.426396	0.437044	0.44626	0.461774	0.430805	0.437469	0.425825	0.429662	0.429709	0.431583	0.440919	0.439713	0.440489	0.443733	0.439063	0.443925	0.442125	0.433166	0.433977	0.433951	0.432935	0.431065	0.431782	0.436489	0.434426	0.431964	0.43122	0.43385	0.431411	0.430799	0.433054	0.431102	0.431337
129	ls_H32_9	H32c9	La Soufriere	France	lava	2.75815	0.05	204.6						0.582537	0.528608	0.518446	0.508524	0.501993	0.461886	0.458436	0.464912	0.448913	0.419432	0.424	0.416238	0.426949	0.419171	0.419677	0.416563	0.413818	0.411664	0.407008	0.403761	0.401008	0.396974	0.39465	0.39541	0.391858	0.391397	0.388632	0.390677	0.385443	0.38954	0.38966	0.387108	0.3863	0.387198	0.385142	0.384223
130	ls_H32_10	H32c10	La Soufriere	France	lava	2.76246	0.05	212.2						0.508924	0.556267	0.489045	0.463927	0.465415	0.448487	0.443072	0.409447	0.40699	0.400577	0.404116	0.392614	0.388466	0.390879	0.383313	0.385469	0.380867	0.37646	0.374709	0.375534	0.371648	0.36915	0.366184	0.368149	0.365252	0.366262	0.367367	0.365796	0.365131	0.36529	0.364381	0.36357	0.36386	0.364039	0.364055	0.363873
131	ls_wp1285_2	Wp1285c2	La Soufriere	France	lava	2.41775	0.13	78.5	78.52	28.42	20	40	uni_WP1285_2d.txt	0.306918	0.280344	0.318838	0.324975	0.302361	0.353812	0.334922	0.338511	0.328206	0.341932	0.350644	0.355619	0.356772	0.368766	0.376318	0.395359	0.38836	0.400961	0.40175	0.40378	0.40699	0.414796	0.418011	0.42033	0.426654	0.425217	0.43128	0.432362	0.433952	0.437063	0.43879	0.442714	0.447689	0.449517	0.455364	0.458313
132	ls_wp1285_4	Wp1285c4	La Soufriere	France	lava	2.45916	0.12	66.1	66.10	17.81	20	40	uni_WP1285_4w.txt	0.336443	0.319665	0.36281	0.365972	0.359721	0.345118	0.335938	0.377311	0.386902	0.380331	0.394121	0.406385	0.403831	0.420208	0.42544	0.437462	0.442248	0.450304	0.457342	0.465967	0.464512	0.467564	0.473781	0.47746	0.477942	0.478834	0.479933	0.484132	0.488149	0.487754	0.490299	0.494273	0.495726	0.499385	0.505737	0.509612
133	ls_wp1285_6	Wp1285c6	La Soufriere	France	lava	2.43159	0.12	57.3	57.31	20.02	20	40	uni_WP1285_6w.txt	0.4656	0.460373	0.449794	0.410289	0.446947	0.430589	0.404819	0.398778	0.393034	0.368254	0.373899	0.389672	0.393827	0.389719	0.390957	0.40043	0.400132	0.40508	0.410268	0.410231	0.416526	0.415255	0.418062	0.421898	0.421899	0.42401	0.427112	0.430633	0.429727	0.432249	0.433762	0.433483	0.436655	0.439332	0.442298	0.443907
134	ls_wp1285_8	Wp1285c8	La Soufriere	France	lava	2.42314	0.13	63	62.96	24.92	20	40	uni_WP1285_8d.txt	0.465087	0.44319	0.431196	0.402193	0.42506	0.439932	0.414377	0.415042	0.411392	0.409018	0.411608	0.416629	0.418888	0.419258	0.432976	0.429963	0.43209	0.434943	0.440393	0.443606	0.449534	0.451129	0.454937	0.457029	0.460116	0.462554	0.463608	0.463904	0.466898	0.467287	0.467748	0.470994	0.473059	0.475726	0.480752	0.484921
135	ls_wp1285_9	Wp1285c9	La Soufriere	France	lava	2.46209	0.12	66.8	66.78	24.33	20	40	uni_WP1285_9w.txt	0.533001	0.513978	0.531906	0.504691	0.526932	0.496128	0.494599	0.477704	0.463752	0.457103	0.455564	0.461548	0.468746	0.466993	0.47842	0.476262	0.488221	0.487437	0.488975	0.495872	0.498943	0.504421	0.506062	0.505313	0.507776	0.509057	0.51302	0.514311	0.511888	0.514324	0.516902	0.520012	0.523065	0.525874	0.531266	0.53515
136	ls_wp1285_11	Wp1285c11	La Soufriere	France	lava	2.4241	0.12	87.2	87.17	27.90	20	40	uni_WP1285_11d.txt	0.41153	0.395939	0.394919	0.366611	0.40189	0.403268	0.382993	0.38252	0.356521	0.38398	0.368922	0.378518	0.388927	0.388761	0.401747	0.400427	0.402221	0.406196	0.411363	0.413452	0.411723	0.413903	0.420804	0.420709	0.420433	0.419945	0.424816	0.426417	0.426537	0.42752	0.428208	0.429101	0.431821	0.434669	0.435358	0.439259
137	ls_wp1317_2	Wp1317c2	La Soufriere	France	lava	2.24714	0.16	67.3	67.31	20.88	20	40	uni_WP1317_2d.txt	0.498837	0.433575	0.419285	0.418801	0.427105	0.378309	0.39572	0.385904	0.372862	0.365137	0.357815	0.354646	0.360285	0.361257	0.357191	0.358412	0.359814	0.359088	0.356783	0.358319	0.358907	0.356561	0.35849	0.357285	0.356519	0.359147	0.360336	0.357461	0.358215	0.357288	0.357722	0.358	0.35703	0.360573	0.363115	0.36175
138	ls_wp1317_10	Wp1317c10	La Soufriere	France	lava	2.30079	0.15	74.8	74.79	26.24	20	40	uni_WP1317_10w.txt	0.479997	0.427268	0.407057	0.399614	0.397374	0.358321	0.345953	0.315293	0.296782	0.275879	0.266902	0.268976	0.262242	0.258327	0.243551	0.239651	0.236094	0.226618	0.225281	0.221102	0.218586	0.214218	0.21383	0.211235	0.212399	0.209744	0.2105	0.205284	0.206733	0.205654	0.20308	0.203922	0.203141	0.201507	0.204479	0.204836
139	ls_wp1317_15	Wp1317c15	La Soufriere	France	lava	2.30286	0.14	95.9	95.93	26.01	20	40	uni_WP1317_15w.txt	0.457563	0.437858	0.425307	0.433873	0.422046	0.398267	0.388763	0.379073	0.362298	0.35843	0.356974	0.355675	0.350437	0.361925	0.353466	0.351594	0.348569	0.344614	0.344306	0.345815	0.344181	0.345341	0.345859	0.34353	0.343641	0.343095	0.342143	0.342897	0.342104	0.342216	0.343425	0.343466	0.342786	0.343597	0.342187	0.343736
140	rh_2D	Rh2D	Ruapehu	New Zealand	lava	2.38388	0.1399							0.276055	0.308485	0.30803	0.288134	0.319681	0.292812	0.296394	0.289929	0.312566	0.289368	0.302565	0.312854	0.306543	0.315275	0.32271	0.314729	0.321432	0.32043	0.322296	0.323565	0.325194	0.325316	0.322213	0.323443	0.318957	0.323532	0.326397	0.325992	0.323885	0.325782	0.324143	0.326482	0.327468	0.325056	0.326504	0.326677
141	rh_2F	Rh2F	Ruapehu	New Zealand	lava	2.34731	0.153							0.414948	0.39642	0.386122	0.442364	0.403592	0.423751	0.41133	0.414331	0.440199	0.431983	0.42351	0.44602	0.445669	0.44445	0.4525	0.451645	0.458466	0.457887	0.463031	0.45185	0.4579	0.454328	0.453802	0.448498	0.455102	0.453954	0.456546	0.45427	0.452109	0.453187	0.453796	0.455786	0.45441	0.45553	0.457259	0.459128
142	rh_4C	Rh4C	Ruapehu	New Zealand	clastic	2.09411	0.244168							0.294446	0.273085	0.216158	0.235428	0.226673	0.229299	0.233918	0.212492	0.212345	0.197536	0.209306	0.207524	0.215682	0.220957	0.220531	0.218013	0.214794	0.215457	0.214029	0.21068	0.211905	0.21295	0.21033	0.209257	0.212088	0.209017	0.209272	0.208364	0.207064	0.209608	0.208396	0.207695	0.20778	0.208427	0.209299	0.208475
143	rh_4E	Rh4E	Ruapehu	New Zealand	clastic	2.06873	0.244367							0.272491	0.229139	0.265491	0.231108	0.243945	0.236431	0.216114	0.227495	0.234194	0.215701	0.220304	0.224164	0.232715	0.225271	0.234347	0.227777	0.233136	0.228805	0.230188	0.229894	0.229422	0.230888	0.227072	0.225077	0.228664	0.229117	0.226575	0.226042	0.225572	0.225529	0.224422	0.225539	0.224827	0.224341	0.226544	0.225239
144	rh_4F	Rh4F	Ruapehu	New Zealand	clastic	2.13206	0.224978							0.272574	0.291131	0.207339	0.269992	0.270188	0.241878	0.223212	0.211473	0.226488	0.225869	0.215479	0.210685	0.223099	0.224689	0.22356	0.219401	0.22188	0.2191	0.220433	0.215959	0.215267	0.21699	0.216076	0.215543	0.214419	0.214941	0.210174	0.213336	0.212399	0.211602	0.211937	0.212308	0.213064	0.212998	0.213923	0.215215
145	rh_4G	Rh4G	Ruapehu	New Zealand	clastic	2.06677	0.250722							0.236401	0.23528	0.216325	0.217856	0.228781	0.215128	0.224612	0.217844	0.219447	0.218139	0.224509	0.223103	0.231732	0.229569	0.233664	0.229691	0.23252	0.233909	0.230032	0.230322	0.227251	0.229882	0.225302	0.227862	0.227164	0.223952	0.223349	0.225928	0.225548	0.224222	0.22505	0.225373	0.224835	0.22508	0.225974	0.225118
146	rh_6A	Rh6A	Ruapehu	New Zealand	clastic	1.72155	0.377872	13.0921	15.18	6.36	20.066	42	6a.txt	0.287133	0.284241	0.258585	0.256697	0.280803	0.250606	0.265231	0.252209	0.233787	0.2499	0.262933	0.261692	0.265202	0.265243	0.278672	0.271045	0.267244	0.27021	0.27527	0.275634	0.275905	0.276027	0.27892	0.278576	0.276354	0.277059	0.280716	0.279382	0.280747	0.280547	0.282487	0.283695	0.283101	0.284162	0.285563	0.286448
147	rh_6D	Rh6D	Ruapehu	New Zealand	clastic	1.48358	0.467731	3.78506	4.24	2.11	20.06	41.68	6D.txt	0.294803	0.259869	0.262955	0.253757	0.255514	0.265691	0.25945	0.246759	0.252732	0.250583	0.245059	0.252718	0.259591	0.238763	0.265366	0.252102	0.250575	0.25557	0.255283	0.253335	0.253614	0.252541	0.251867	0.253431	0.253586	0.250618	0.255337	0.252833	0.253812	0.251343	0.252314	0.253279	0.254278	0.253769	0.254669	0.256241
148	rh_6E	Rh6E	Ruapehu	New Zealand	clastic	1.67368	0.399985							0.302123	0.269539	0.25979	0.253851	0.235351	0.262923	0.251536	0.252018	0.264784	0.265864	0.269166	0.266487	0.274434	0.275342	0.279414	0.272695	0.273486	0.281939	0.280561	0.281898	0.28536	0.281255	0.283653	0.286439	0.286638	0.285414	0.286758	0.28764	0.28918	0.291291	0.288536	0.291144	0.292637	0.29451	0.295301	0.295391
149	rh_6F	Rh6F	Ruapehu	New Zealand	clastic	1.74102	0.372966							0.293541	0.253614	0.25539	0.262282	0.255902	0.250116	0.247487	0.258381	0.255846	0.241585	0.250778	0.248975	0.251589	0.253545	0.261404	0.255502	0.254312	0.260944	0.256588	0.260059	0.258038	0.259619	0.263316	0.259212	0.257997	0.258842	0.26029	0.25984	0.261161	0.26194	0.260816	0.261513	0.262656	0.262509	0.263118	0.263643
150	rh_6H	Rh6H	Ruapehu	New Zealand	clastic	1.94486	0.373775							0.278925	0.28045	0.294227	0.242637	0.248555	0.25116	0.250689	0.243913	0.246152	0.246852	0.249192	0.249344	0.249037	0.251962	0.261659	0.261082	0.25726	0.258331	0.259216	0.256013	0.261723	0.2612	0.26181	0.257777	0.258513	0.25774	0.259246	0.257831	0.258032	0.260292	0.259694	0.260003	0.260026	0.261242	0.261419	0.262472
151	rh_8B	Rh8B	Ruapehu	New Zealand	lava	2.23162	0.193498							0.310317	0.285142	0.306667	0.298426	0.286579	0.277019	0.252653	0.230297	0.239065	0.216029	0.227329	0.21864	0.220666	0.221889	0.215767	0.217991	0.216795	0.216973	0.21431	0.208475	0.207901	0.208249	0.209254	0.208289	0.210184	0.207119	0.207579	0.208245	0.2059	0.205984	0.20613	0.205347	0.205092	0.205912	0.20505	0.206062
152	rh_8F	Rh8F	Ruapehu	New Zealand	lava	2.23509	0.19444							0.361983	0.299007	0.33127	0.274401	0.292473	0.271499	0.245448	0.255232	0.239241	0.222643	0.22243	0.218533	0.224677	0.216659	0.216997	0.218097	0.216867	0.21702	0.214818	0.215391	0.215321	0.214601	0.211987	0.212318	0.212317	0.211523	0.209488	0.210234	0.210676	0.210118	0.209946	0.209916	0.209458	0.209636	0.209553	0.211086
153	rh_11A	Rh11a	Ruapehu	New Zealand	lava	2.51263	0.0925							0.302965	0.33343	0.302481	0.348644	0.327274	0.355908	0.373809	0.379126	0.414635	0.408334	0.428376	0.440076	0.443004	0.453166	0.457471	0.46228	0.46517	0.470218	0.470719	0.474562	0.477659	0.477225	0.475912	0.477968	0.479337	0.482609	0.483423	0.482264	0.486964	0.485271	0.484835	0.489803	0.487288	0.489746	0.491012	0.4923
154	rh_11D	Rh11d	Ruapehu	New Zealand	lava	2.50936	0.0903							0.310342	0.298603	0.348697	0.384181	0.382247	0.405551	0.406695	0.445217	0.439965	0.453175	0.471398	0.483807	0.501202	0.492325	0.509907	0.508501	0.510181	0.505763	0.519197	0.520892	0.518484	0.519199	0.519313	0.521269	0.520456	0.522143	0.522897	0.523937	0.526693	0.526007	0.525812	0.526918	0.527936	0.528521	0.530122	0.529596
155	rh_14D	Rh14d	Ruapehu	New Zealand	lava	2.41703	0.0956							0.615373	0.567777	0.59134	0.554323	0.526322	0.461095	0.45814	0.404036	0.356316	0.325887	0.33606	0.311671	0.306412	0.290998	0.296668	0.293356	0.265971	0.264437	0.255062	0.250964	0.24756	0.246249	0.241351	0.242224	0.239338	0.231298	0.231073	0.233203	0.231578	0.22654	0.227821	0.225175	0.21869	0.218927	0.220785	0.220082
156	rh_16B	Rh16b	Ruapehu	New Zealand	lava	2.44531	0.0851							0.208119	0.187373	0.190812	0.216678	0.206247	0.227318	0.245967	0.250529	0.273939	0.280871	0.280526	0.293107	0.293249	0.292733	0.311474	0.306064	0.310031	0.315444	0.307587	0.311658	0.312545	0.316987	0.313382	0.317511	0.315285	0.316696	0.317178	0.319244	0.31648	0.316251	0.317562	0.319947	0.32128	0.320815	0.319512	0.31913
157	rh_16E	Rh16e	Ruapehu	New Zealand	lava	2.41725	0.0954							0.222026	0.221398	0.222926	0.224684	0.250037	0.226849	0.236324	0.238032	0.235289	0.237451	0.23573	0.25105	0.253881	0.254419	0.243257	0.252492	0.253094	0.254484	0.255221	0.256896	0.257039	0.261736	0.259032	0.260511	0.256608	0.257346	0.257512	0.257058	0.255651	0.258345	0.260428	0.257534	0.259375	0.259857	0.260304	0.259335
158	rh_21A	Rh21a	Ruapehu	New Zealand	lava	2.67823	0.0667438							0.415921	0.409862	0.435713	0.444564	0.451417	0.469338	0.458081	0.47004	0.49417	0.492392	0.503843	0.525385	0.529103	0.539171	0.541357	0.55316	0.555741	0.567488	0.571849	0.571195	0.575298	0.573754	0.58016	0.581266	0.578735	0.58302	0.584875	0.585297	0.587344	0.587923	0.587987	0.588751	0.590996	0.593906	0.5959	0.595642
159	rh_21B	Rh21b	Ruapehu	New Zealand	lava	2.66928	0.0662911	135.46	159.40	19.45	20.09	42.056	21_b.txt	0.419677	0.418563	0.428211	0.457547	0.445342	0.470724	0.489392	0.510576	0.530754	0.559153	0.584019	0.612857	0.621274	0.634504	0.635643	0.65044	0.662657	0.668473	0.672274	0.675592	0.675826	0.681869	0.684802	0.687603	0.686862	0.691305	0.694274	0.693327	0.69629	0.698162	0.697937	0.703486	0.701998	0.703851	0.707736	0.707791
160	rh_21e	Rh21e	Ruapehu	New Zealand	lava	2.67001	0.066685							0.464189	0.469531	0.4811	0.453605	0.457428	0.44547	0.442527	0.470227	0.452154	0.455145	0.47423	0.467201	0.463965	0.488906	0.484731	0.49751	0.491468	0.508318	0.503835	0.505268	0.504574	0.503015	0.507918	0.509724	0.504699	0.504054	0.509623	0.512939	0.507889	0.5118	0.512765	0.511832	0.510707	0.511452	0.51432	0.514707
161	rh_28A	Rh28a	Ruapehu	New Zealand	clastic	1.71278	0.412							0.420029	0.392993	0.370232	0.344746	0.345456	0.322814	0.31995	0.284895	0.271379	0.256807	0.268085	0.259593	0.266336	0.256694	0.250774	0.260654	0.250629	0.25666	0.257689	0.255827	0.256258	0.261632	0.259746	0.261978	0.258449	0.256999	0.257424	0.259938	0.256945	0.256557	0.258655	0.260987	0.261964	0.264748	0.26844	0.274176
162	rh_28E	Rh28e	Ruapehu	New Zealand	clastic	1.70147	0.4232	10.43	12.07	3.39	19.73	41.65	28E.txt	0.368832	0.369748	0.354254	0.363014	0.334418	0.324331	0.299375	0.293063	0.28931	0.276678	0.273728	0.270737	0.276684	0.281804	0.274106	0.278594	0.27542	0.278062	0.278032	0.279957	0.283004	0.284263	0.28405	0.282412	0.283486	0.283595	0.283701	0.283579	0.282644	0.284178	0.284347	0.285935	0.287703	0.290639	0.295748	0.300731
163	rh_38B	Rh38B	Ruapehu	New Zealand	lava	2.44011	0.187871							0.115725	0.122926	0.110638	0.124562	0.141906	0.130942	0.133692	0.158232	0.165584	0.171323	0.171972	0.184041	0.18721	0.183326	0.193432	0.194495	0.198523	0.203093	0.206284	0.210692	0.20871	0.211308	0.21254	0.214078	0.214781	0.215275	0.213817	0.216652	0.217813	0.218022	0.21886	0.220289	0.219745	0.220494	0.222579	0.223759
164	rh_38C	Rh38c	Ruapehu	New Zealand	lava	2.39434	0.2063	60.6357	71.53	14.89	19.87	41.23	38C.txt	0.445188	0.417343	0.387	0.361545	0.337688	0.343561	0.328138	0.324671	0.299629	0.302375	0.293451	0.298718	0.299528	0.29983	0.29779	0.299325	0.30456	0.29956	0.302362	0.310733	0.308889	0.311081	0.309765	0.309571	0.308574	0.309414	0.310756	0.30896	0.30799	0.30971	0.307299	0.30921	0.309495	0.310549	0.312974	0.313472
165	rh_38D	Rh38D	Ruapehu	New Zealand	lava	2.41794	0.177844							0.146181	0.135429	0.162043	0.128768	0.161533	0.165142	0.180588	0.186637	0.193471	0.197936	0.196156	0.216101	0.219419	0.231876	0.236025	0.238589	0.24539	0.25002	0.255229	0.259826	0.263504	0.267354	0.265044	0.270337	0.272851	0.269533	0.271141	0.270177	0.272483	0.272716	0.274957	0.276817	0.27715	0.279047	0.279576	0.281448
166	rh_38E	Rh38e	Ruapehu	New Zealand	lava	2.42802	0.1983	76.6179						0.437905	0.453998	0.431217	0.377641	0.368705	0.359915	0.334892	0.3074	0.300844	0.285416	0.275726	0.270334	0.267736	0.262742	0.25755	0.259363	0.254275	0.252842	0.253022	0.251552	0.252755	0.248014	0.24852	0.25023	0.248985	0.245516	0.246221	0.246945	0.244345	0.244632	0.244009	0.244434	0.24687	0.245778	0.246229	0.249037
167	rh_42bA	Rh42Ba	Ruapehu	New Zealand	clastic	1.80866	0.3547	38.8409	44.52	6.46	19.923	41.28	42_2_A.txt	0.288136	0.295123	0.260852	0.255673	0.249431	0.232135	0.244075	0.214581	0.205124	0.212569	0.215245	0.196822	0.192231	0.203879	0.19874	0.197179	0.193154	0.192021	0.187286	0.184582	0.181214	0.182218	0.180743	0.177637	0.178668	0.178393	0.177511	0.178887	0.174271	0.173348	0.173483	0.171824	0.17285	0.171957	0.171044	0.171725
168	rh_42bB	Rh42Bb	Ruapehu	New Zealand	clastic	1.82626	0.3275							0.322917	0.373645	0.319581	0.313351	0.30912	0.266534	0.258437	0.22993	0.239013	0.214353	0.223128	0.213021	0.216481	0.207242	0.208909	0.208911	0.201707	0.199027	0.198839	0.191575	0.190754	0.189289	0.184731	0.183461	0.183963	0.183538	0.18055	0.178139	0.177826	0.177763	0.173732	0.174762	0.173589	0.1717	0.170989	0.170623
169	rh_42bD	Rh42Bd	Ruapehu	New Zealand	clastic	1.8501	0.3234	42.5955	49.99	14.06	19.94	41.156	42_2_D.txt	0.416756	0.404864	0.38721	0.36925	0.350897	0.325965	0.287356	0.288548	0.249257	0.238309	0.240388	0.238974	0.227441	0.222808	0.220801	0.215951	0.207621	0.205652	0.202098	0.198982	0.19748	0.192857	0.192601	0.190741	0.191491	0.186423	0.186313	0.188207	0.183983	0.18368	0.183269	0.181145	0.181249	0.179844	0.179707	0.178986
170	rh_42bE	Rh42Be	Ruapehu	New Zealand	clastic	1.84898	0.3237	39.88			19.9967	41.8233		0.406649	0.399539	0.382448	0.376753	0.334391	0.327338	0.292197	0.284135	0.270932	0.251302	0.239451	0.238388	0.2296	0.225832	0.224103	0.221047	0.210716	0.207978	0.205227	0.204483	0.201608	0.196414	0.191016	0.191944	0.190742	0.188294	0.187723	0.186558	0.183669	0.183967	0.18168	0.178801	0.179584	0.178724	0.178643	0.178294
171	rh_50_B2B	Rh50B2b	Ruapehu	New Zealand	lava	2.31713	0.0256	73.5574	86.46	16.56	20.0433	41.5233	B2B.txt	0.440789	0.42032	0.369951	0.398007	0.399109	0.381058	0.356765	0.329997	0.34472	0.354802	0.357771	0.370731	0.382878	0.391393	0.397021	0.39904	0.412308	0.419638	0.42822	0.428601	0.434728	0.440226	0.440613	0.44386	0.445552	0.446061	0.448265	0.449853	0.450166	0.451539	0.451155	0.452466	0.452506	0.451224	0.452356	0.450455
172	rh_50_B2C	Rh50B2c	Ruapehu	New Zealand	lava	2.29133	0.0443	82.4774	97.24	18.88	20.0333	40.5333	B2C.txt	0.391022	0.390336	0.386056	0.384973	0.344166	0.338881	0.347607	0.323718	0.318561	0.307414	0.332409	0.348873	0.359866	0.364639	0.37298	0.388578	0.402009	0.405429	0.41576	0.429434	0.42952	0.435202	0.441645	0.446347	0.444395	0.45018	0.454168	0.453277	0.455735	0.456783	0.457623	0.457687	0.458382	0.455449	0.457237	0.456559
173	rh_50_B2D	Rh50B2d	Ruapehu	New Zealand	lava	2.29863	0.0362							0.318363	0.331895	0.333494	0.355776	0.344124	0.348299	0.3593	0.370154	0.375683	0.391224	0.409324	0.432699	0.460402	0.479286	0.486706	0.505729	0.523114	0.534628	0.54463	0.561269	0.560706	0.569233	0.580524	0.579176	0.581145	0.58758	0.587174	0.588077	0.589367	0.590905	0.595334	0.593699	0.594041	0.59524	0.59446	0.595513
174	rh_52b_C2C	Rh52BC2c	Ruapehu	New Zealand	lava	2.20924	0.1987	34.6909	40.62	10.09	20.0233	41.4533	C2C.txt	0.282623	0.285398	0.273187	0.280137	0.28089	0.253376	0.243722	0.238835	0.236077	0.238906	0.232297	0.225771	0.228396	0.227926	0.227851	0.229479	0.224628	0.22799	0.224636	0.222554	0.220327	0.219102	0.218238	0.216842	0.217298	0.217458	0.215418	0.213652	0.213161	0.211794	0.211403	0.211765	0.210435	0.210085	0.210847	0.209803
175	rh_52b_C2D	Rh52BC2d	Ruapehu	New Zealand	lava	2.25304	0.1872	50.9711	60.15	16.59	19.9333	41.0567	C2D.txt	0.276051	0.274707	0.258791	0.263172	0.273321	0.26805	0.256178	0.242462	0.243231	0.25081	0.238516	0.241901	0.239717	0.242168	0.238326	0.241505	0.238804	0.236744	0.236248	0.231538	0.232167	0.233644	0.22965	0.227514	0.229527	0.229334	0.22911	0.227784	0.226785	0.225617	0.226459	0.22611	0.225805	0.225875	0.227407	0.225669
176	rh_52b_C1A	C1A	Ruapehu	New Zealand	lava	2.64704	0.0314	112.944	133.25	24.13	19.9567	42.0233	C1A.txt	0.276625	0.281828	0.268407	0.249017	0.269251	0.240123	0.232639	0.209149	0.214312	0.209458	0.215421	0.217365	0.217819	0.214879	0.212105	0.218508	0.222866	0.219459	0.218504	0.223945	0.224605	0.224394	0.224373	0.222149	0.220237	0.218803	0.22278	0.221907	0.220414	0.219848	0.221073	0.22055	0.221297	0.222927	0.223675	0.223767
177	rh_52b_C1E	C1E	Ruapehu	New Zealand	lava	2.65637	0.0233	103.809	122.34	18.84	19.9233	41.97	C1E.txt	0.323389	0.310522	0.29562	0.274517	0.263677	0.261851	0.248166	0.252677	0.229999	0.224881	0.231187	0.226838	0.225699	0.228791	0.222976	0.220264	0.229384	0.229733	0.228375	0.224722	0.224708	0.222584	0.223225	0.220574	0.220782	0.220637	0.222985	0.222713	0.219016	0.219372	0.218883	0.218397	0.218802	0.218417	0.218983	0.219214
178	rh_B1A	B1A	Ruapehu	New Zealand	lava	2.29832	0.0965	60.2378	70.81	15.02	19.9667	42.02	B1A.txt	0.372032	0.366268	0.379629	0.353169	0.376212	0.414288	0.453919	0.460325	0.497473	0.512896	0.544537	0.551206	0.550012	0.570564	0.576173	0.570381	0.582997	0.582088	0.58363	0.588961	0.587612	0.593384	0.588456	0.593584	0.591911	0.591498	0.59237	0.592723	0.592205	0.593197	0.592843	0.595614	0.595017	0.59408	0.59168	0.591771
179	rh_B1C	B1C	Ruapehu	New Zealand	lava	2.23122	0.124	34.4569	40.38	14.86	19.8133	41.3367	B1C.txt	0.34928	0.329253	0.362755	0.330059	0.369204	0.402754	0.432457	0.427453	0.444257	0.448516	0.476831	0.472505	0.469967	0.483535	0.486862	0.49694	0.497548	0.503366	0.510724	0.513142	0.510364	0.504163	0.513685	0.51066	0.504865	0.510217	0.512825	0.507559	0.510715	0.510721	0.513132	0.509017	0.511064	0.512395	0.508057	0.510111
180	rh_55_2	Rh55c2	Ruapehu	New Zealand	lava	2.62761	0.00719991	240.004	242.98	36.30	19.66	39.46	test1668_eurotronic.txt	0.125024	0.129891	0.125722	0.110599	0.125675	0.132876	0.109998	0.107291	0.120486	0.120215	0.121216	0.119907	0.123128	0.117054	0.117647	0.119633	0.115903	0.114618	0.118592	0.115318	0.113887	0.112947	0.112188	0.112101	0.113628	0.111592	0.112019	0.111078	0.110346	0.109672	0.10829	0.109172	0.107454	0.106629	0.106199	0.105729
181	rh_55_4	Rh55c4	Ruapehu	New Zealand	lava	2.62093	0.00443398	375.686	380.80	38.47	19.66	40.03	test1669_eurotronic.txt	0.122505	0.125573	0.110695	0.140834	0.137972	0.123736	0.0931632	0.136248	0.122356	0.127712	0.115241	0.123065	0.115491	0.120321	0.110014	0.114164	0.114521	0.110301	0.108692	0.108984	0.106235	0.109313	0.107067	0.105721	0.1069	0.10248	0.103601	0.102885	0.101064	0.100728	0.100889	0.0998063	0.100282	0.100092	0.0979024	0.0972395
182	rh_56_2	Rh56c2	Ruapehu	New Zealand	lava	2.24218	0.166956	79.2842	79.95	16.37	19.57	40.58	test1660_eurotronic.txt	0.0971189	0.10331	0.129719	0.110775	0.110124	0.108668	0.105893	0.115761	0.113072	0.106395	0.107169	0.11789	0.115054	0.118272	0.117915	0.118167	0.114613	0.116866	0.114432	0.112062	0.113073	0.113969	0.111739	0.110461	0.111391	0.110742	0.107562	0.107852	0.108504	0.107635	0.106974	0.106436	0.106865	0.105665	0.105346	0.10505
183	rh_56_3	Rh56c3	Ruapehu	New Zealand	lava	2.14239	0.203597	54.3533	57.15	13.92	19.57	39.57	test1661_eurotronic.txt	0.114001	0.0921144	0.104088	0.11284	0.115205	0.104148	0.107023	0.119527	0.114453	0.12581	0.104674	0.115991	0.121635	0.124087	0.121798	0.120619	0.120015	0.116701	0.116489	0.112454	0.111862	0.110639	0.11065	0.108739	0.10854	0.105634	0.106121	0.105154	0.104551	0.104329	0.102869	0.101741	0.102268	0.10064	0.100139	0.099484
184	rh_56_4	Rh56c4	Ruapehu	New Zealand	lava	2.17376	0.191321	60.4037	60.73	15.58	19.55	38.17	test1662_eurotronic.txt	0.111465	0.123469	0.107138	0.126949	0.110375	0.120498	0.110246	0.105467	0.103963	0.112957	0.110387	0.120282	0.118848	0.121828	0.121267	0.125578	0.126013	0.12274	0.124388	0.125146	0.123006	0.123279	0.122444	0.122	0.121896	0.120219	0.119988	0.119983	0.117693	0.118168	0.119033	0.1172	0.118236	0.117565	0.117907	0.117654
185	rh_56_5	Rh56c5	Ruapehu	New Zealand	lava	2.20341	0.171119	64.0899	65.22	15.24	19.32	39.6	test1663_eurotronic.txt	0.113042	0.127744	0.11586	0.105741	0.107251	0.111428	0.102707	0.101431	0.0952489	0.106339	0.106503	0.113967	0.113934	0.111601	0.114915	0.121085	0.120302	0.117829	0.116804	0.119093	0.115813	0.114793	0.113687	0.113756	0.112909	0.112861	0.111738	0.111636	0.111287	0.110302	0.110043	0.109701	0.109312	0.108474	0.109375	0.108661
186	rh_56_6	Rh56c6	Ruapehu	New Zealand	lava	2.20469	0.182154	64.0836	64.23	16.44	19.63	38.04	test1664_eurotronic.txt	0.0970529	0.111102	0.106382	0.108779	0.0942579	0.109238	0.0948663	0.101757	0.101974	0.107399	0.106219	0.112594	0.108793	0.116312	0.113622	0.116175	0.11866	0.116145	0.115982	0.117604	0.115371	0.114531	0.11313	0.113294	0.112442	0.110204	0.110604	0.110213	0.10999	0.108855	0.108969	0.108534	0.108273	0.107043	0.108416	0.107521
187	rh_56_7	Rh56c7	Ruapehu	New Zealand	lava	2.26147	0.158396	81.1483	81.87	16.59	19.56	40.24	test1665_eurotronic.txt	0.107558	0.102807	0.106639	0.113803	0.101022	0.103124	0.0944041	0.114531	0.11004	0.124746	0.11645	0.122071	0.128314	0.137108	0.131192	0.131065	0.132066	0.129929	0.129144	0.1238	0.122794	0.122883	0.12126	0.121239	0.119015	0.118739	0.119079	0.116166	0.115954	0.11582	0.114213	0.11393	0.114184	0.112063	0.113193	0.111749
188	rh_56_8	Rh56c8	Ruapehu	New Zealand	lava	2.27644	0.150032	87.2859	88.28		19.52	40	test1666_eurotronic.txt	0.134805	0.146358	0.124234	0.12771	0.124782	0.111201	0.140972	0.135312	0.131245	0.142936	0.143354	0.14441	0.149709	0.149587	0.143815	0.143861	0.14056	0.137277	0.135978	0.138556	0.132985	0.133761	0.132693	0.130778	0.131923	0.131414	0.128888	0.128689	0.128104	0.127616	0.128006	0.126782	0.126566	0.126037	0.125532	0.125935
189	rh_56_9	Rh56c9	Ruapehu	New Zealand	lava	2.23388	0.166914	76.6485	77.42	15.52	19.52	39.74	test1659_eurotronic.txt	0.129959	0.130009	0.124382	0.112587	0.121107	0.114211	0.126137	0.117263	0.104158	0.116445	0.120142	0.123213	0.125096	0.134982	0.125849	0.126297	0.12471	0.125447	0.122121	0.124858	0.125559	0.123396	0.121388	0.12101	0.11869	0.119011	0.117866	0.115996	0.116142	0.114959	0.116026	0.113469	0.113908	0.113368	0.113544	0.112542
190	rh_56_10	Rh56c10	Ruapehu	New Zealand	lava	2.15763	0.189164	49.9544	50.21	14.05	19.47	39.28	test1667_eurotronic.txt	0.127887	0.129866	0.117283	0.116526	0.108987	0.108904	0.112084	0.119863	0.116903	0.126105	0.122307	0.121794	0.124925	0.128552	0.126161	0.127047	0.131267	0.128615	0.126715	0.128551	0.128166	0.126067	0.125548	0.123261	0.123118	0.123369	0.122616	0.122138	0.121118	0.120455	0.120365	0.119548	0.120302	0.11898	0.119223	0.118449
191	rh_103_1	Rh103c1	Ruapehu	New Zealand	clastic	1.53016	0.481069	2.79754			19.33	40.83	-	0.143737	0.163958	0.1673	0.166117	0.175606	0.201818	0.206491	0.242229	0.252101	0.285709	0.295239	0.30337	0.321049	0.326687	0.334662	0.33858	0.344288	0.350004	0.353026	0.359564	0.363065	0.3597	0.360648	0.363587	0.364979	0.367054	0.366063	0.368012	0.372793	0.36987	0.372728	0.374817	0.377137	0.377217	0.378191	0.377312
192	rh_103_2	Rh103c2	Ruapehu	New Zealand	clastic	1.66868	0.419006	6.59821	5.76		19.21	41.13	test1699_eurotronic.txt	0.155871	0.176355	0.171663	0.186413	0.197964	0.207278	0.238156	0.243144	0.265736	0.281848	0.289356	0.300542	0.30693	0.315192	0.317122	0.317772	0.323494	0.324493	0.330812	0.33066	0.329946	0.331868	0.334246	0.332697	0.33655	0.333666	0.334793	0.338396	0.339993	0.341722	0.344172	0.345265	0.346397	0.348697	0.348011	0.349476
193	rh_105_1	Rh105c1	Ruapehu	New Zealand	lava	2.15171	0.201736	66.181	67.76	8.18	19.21	40.16	test1670_eurotronic.txt	0.144082	0.163822	0.134815	0.148578	0.153245	0.165171	0.176298	0.173511	0.182072	0.187279	0.19243	0.202214	0.211925	0.208549	0.20993	0.215369	0.219458	0.221815	0.224845	0.225887	0.229088	0.228419	0.228419	0.225895	0.227505	0.22855	0.227269	0.227117	0.22677	0.226914	0.228202	0.22765	0.227591	0.229467	0.229769	0.230488
194	rh_105_2	Rh105c2	Ruapehu	New Zealand	lava	2.14766	0.230758	68.824	69.94	9.71	19.37	39.94	test1671_eurotronic.txt	0.142817	0.15143	0.129973	0.149099	0.14744	0.153761	0.168425	0.166021	0.173572	0.176636	0.184343	0.189048	0.196567	0.195371	0.200083	0.201854	0.20621	0.207737	0.209959	0.214305	0.213598	0.215173	0.21629	0.214829	0.215779	0.216334	0.217842	0.215305	0.216841	0.217314	0.218382	0.217681	0.219097	0.220067	0.220912	0.222345
195	rh_105_3	Rh105c3	Ruapehu	New Zealand	lava	2.1593	0.20269	77.1763	78.59	10.57	19.37	37.81	test1672_eurotronic.txt	0.104862	0.120666	0.121672	0.155698	0.137543	0.14589	0.164606	0.169633	0.186089	0.194305	0.19403	0.20102	0.209755	0.210658	0.217997	0.219745	0.22215	0.221584	0.227486	0.227644	0.232155	0.230507	0.229203	0.22917	0.230205	0.22983	0.229177	0.229427	0.230629	0.231686	0.233105	0.230831	0.230448	0.232073	0.231623	0.233453
196	rh_121_2	Rh121c2	Ruapehu	New Zealand	clastic	1.67617	0.396186	17.1408	16.86	2.84	19.1	37.76	test1714_eurotronic.txt	0.062776	0.0563805	0.0620102	0.0579102	0.0600621	0.0625139	0.0603925	0.0656662	0.0677947	0.0711821	0.0738376	0.0715228	0.0744711	0.0741182	0.0745868	0.0764049	0.0762707	0.0766357	0.0769459	0.077944	0.0770451	0.0775397	0.0771952	0.0771553	0.077266	0.0771791	0.0771522	0.0771712	0.0771194	0.0779181	0.0772446	0.0771123	0.0773466	0.0771107	0.0774173	0.0768817
197	rh_121_3	Rh121c3	Ruapehu	New Zealand	clastic	1.695	0.389576	17.4704	17.08	3.07	19.25	38.38	test1715_eurotronic.txt	0.0659098	0.0528539	0.0625899	0.0611128	0.0637122	0.065861	0.066153	0.0647705	0.0696335	0.0735027	0.0749182	0.0743147	0.0782239	0.0773389	0.0777272	0.0793144	0.0805507	0.0798154	0.0814705	0.0828239	0.0818326	0.0818556	0.0817025	0.0817624	0.081793	0.082608	0.0831563	0.0828153	0.0826331	0.082817	0.0831925	0.0830071	0.0833613	0.0835771	0.0835109	0.0834612
198	rh_121_6	Rh121c6	Ruapehu	New Zealand	clastic	1.77914	0.357311		23.00	3.24	19.4	35.29	test1749_eurotronic.txt	0.0633656	0.0550436	0.0627476	0.0650335	0.0713718	0.0696438	0.0701595	0.0704854	0.0799948	0.0819691	0.0882778	0.088314	0.0910853	0.0903585	0.0946343	0.0962987	0.0969318	0.0976672	0.100441	0.100995	0.100813	0.101753	0.101679	0.101623	0.102441	0.10327	0.10267	0.102571	0.102669	0.103517	0.103831	0.104294	0.104228	0.104742	0.104979	0.105121
199	rh_134_1	Rh134c1	Ruapehu	New Zealand	clastic	1.05485	0.635535	2.84113	1.88		19.28	39.05	test1747_eurotronic.txt	0.0553954	0.0484621	0.0480096	0.0402324	0.0505563	0.0482158	0.0413442	0.0469178	0.0464796	0.0429943	0.0437124	0.0406026	0.0429406	0.0432945	0.0440502	0.043503	0.0408124	0.0413514	0.0400974	0.0423295	0.0407723	0.0388608	0.0390386	0.0390075	0.03893	0.0385783	0.0382402	0.0385441	0.03746	0.0380696	0.0379577	0.0381187	0.0380194	0.0378747	0.038363	0.0389846
200	rh_134_2	Rh134c2	Ruapehu	New Zealand	clastic	1.073	0.616045	3.7155			19.2	39.01		0.0543429	0.0392741	0.0474657	0.0452881	0.0436636	0.0431655	0.0389976	0.0387292	0.0395859	0.0371123	0.0396213	0.0359151	0.0382624	0.0361633	0.0365667	0.03778	0.0364831	0.0355234	0.0355622	0.036366	0.0356804	0.0354048	0.0349701	0.0351321	0.0355186	0.0347155	0.0341856	0.0346258	0.0339557	0.0345637	0.0337968	0.034079	0.0341744	0.0345669	0.0346291	0.0355901
201	rh_142_6	Rh142c6	Ruapehu	New Zealand	lava	2.04837	0.20225	80.5412	80.84	16.64	19.66	40.92	test1731_eurotronic.txt	0.0546812	0.0532461	0.0612304	0.051629	0.0521115	0.051013	0.050099	0.0534502	0.0540079	0.0494142	0.0539269	0.0522268	0.0553689	0.054137	0.0546085	0.055401	0.0544632	0.0570889	0.0561408	0.0590745	0.0584949	0.0587279	0.059344	0.060021	0.0610838	0.0602358	0.0608017	0.0606533	0.0609709	0.0614495	0.0617014	0.0614722	0.061476	0.0621732	0.0627291	0.0630175
202	rh_142_7	Rh142c7	Ruapehu	New Zealand	lava	1.82011	0.30104	60.6133	60.67	11.81	19.64	39.91	test1746_eurotronic.txt	0.051048	0.051577	0.058622	0.0511343	0.0574802	0.0642446	0.0650124	0.0645565	0.0690845	0.0712913	0.0744286	0.0776906	0.0788696	0.0803873	0.0813266	0.0840386	0.0844898	0.0874597	0.0884009	0.0894007	0.0902226	0.0908476	0.0913642	0.0915713	0.0915988	0.0921488	0.0921632	0.0921166	0.0930389	0.0930029	0.0933962	0.0936513	0.0938675	0.0943389	0.0946519	0.0949949
203	rh_143_1	Rh143c1	Ruapehu	New Zealand	lava	1.63473	0.373151	29.724	29.65	5.44	19.35	36.81	test1673_eurotronic.txt	0.0533365	0.0493511	0.0511625	0.052674	0.0557989	0.0491059	0.0536549	0.061858	0.0603461	0.0588109	0.0628862	0.0661871	0.0685946	0.0716675	0.071352	0.0720329	0.0749189	0.0749814	0.0770981	0.0785129	0.0817259	0.0816152	0.0817298	0.0826777	0.0819764	0.0832625	0.0831304	0.0834587	0.0842074	0.0841267	0.0841779	0.0854209	0.0860679	0.0868762	0.0872788	0.0882377
204	rh_143_2	Rh143c2	Ruapehu	New Zealand	lava	1.92471	0.247529	70.7533	71.53	12.84	19.49	39.61	test1674_eurotronic.txt	0.045932	0.0455327	0.0550775	0.041726	0.0510159	0.0458726	0.0481177	0.0608617	0.0646384	0.0633276	0.0675362	0.0675717	0.069022	0.0719297	0.0725269	0.072599	0.0722607	0.0758868	0.0764958	0.0766516	0.0782266	0.0780467	0.0779075	0.0774822	0.0781205	0.0782988	0.0781717	0.0779148	0.0784687	0.0792195	0.0793463	0.0793056	0.079684	0.0799535	0.0807964	0.0807288
205	rh_143_3	Rh143c3	Ruapehu	New Zealand	lava	1.98641	0.228807	82.8091	83.56	12.96	19.56	35.85	test1675_eurotronic.txt	0.0486735	0.0420996	0.0408293	0.0428479	0.047502	0.0502107	0.0538811	0.0587025	0.0638943	0.0643643	0.066073	0.0683014	0.0714511	0.0710746	0.072913	0.0744255	0.075151	0.0753297	0.0773795	0.0764581	0.0770922	0.0770062	0.0773664	0.0782256	0.0772289	0.0776056	0.0778603	0.0783489	0.0789472	0.0784036	0.0782612	0.0788593	0.0788957	0.0790131	0.0793004	0.0792299
206	rh_143_5	Rh143c5	Ruapehu	New Zealand	lava	1.99616	0.224651	100.733	101.86	13.66	19.57	39.91	test1676_eurotronic.txt	0.056044	0.0485393	0.054258	0.0509182	0.0509844	0.0516067	0.0600849	0.0534715	0.0575151	0.0578803	0.0622653	0.0626753	0.0648225	0.0656358	0.0662063	0.0671869	0.0689693	0.0688463	0.0707252	0.0719276	0.0721534	0.072743	0.0728315	0.0733157	0.0729186	0.0734436	0.0738455	0.0733667	0.0737074	0.0739412	0.0742207	0.0746467	0.0749091	0.0751055	0.0754725	0.0756227
207	rh_143_6	Rh143c6	Ruapehu	New Zealand	lava	2.09112	0.189932	103.893	104.93	19.87	19.6	39.95	test1677_eurotronic.txt	0.0470178	0.0426861	0.0473316	0.0522047	0.0525438	0.0500862	0.055427	0.0550952	0.0533036	0.0587766	0.0617386	0.0625122	0.0630509	0.0655616	0.0650694	0.0674392	0.0670651	0.0683632	0.0702942	0.0715051	0.0708647	0.071506	0.0714611	0.071224	0.071845	0.0714965	0.0719322	0.0728818	0.0726881	0.0727098	0.0726397	0.0729752	0.0733289	0.0735502	0.0737626	0.0737894
208	rh_143_8	Rh143c8	Ruapehu	New Zealand	lava	2.05421	0.206279	95.9643	96.94	16.87	19.58	36.23	test1678_eurotronic.txt	0.0516513	0.0493307	0.0497736	0.0437108	0.0539556	0.0571443	0.0594079	0.0622383	0.0620337	0.0694483	0.0699338	0.0766603	0.075953	0.0785572	0.0806148	0.0829838	0.0833569	0.0829177	0.0850289	0.0870791	0.0873791	0.0876663	0.0875003	0.0879075	0.0872618	0.088726	0.0887293	0.0885791	0.0889456	0.0896716	0.089994	0.0905434	0.090356	0.0904403	0.0907994	0.0913762
209	rh_144_1	Rh144c1	Ruapehu	New Zealand	lava	1.64892	0.406144	41.4761	41.28	6.10	19.58	41	test1730_eurotronic.txt	0.0517328	0.0414839	0.0471357	0.0455786	0.0512965	0.0514916	0.0522681	0.0555787	0.0587024	0.0574713	0.0589585	0.0638787	0.0660924	0.0639953	0.0672933	0.0682704	0.0687291	0.0694012	0.0725987	0.073633	0.0734602	0.0744052	0.0739914	0.0755498	0.0753493	0.0759222	0.0755875	0.0761502	0.0764468	0.0775065	0.0777439	0.0777316	0.0791861	0.0791323	0.0796979	0.081112
210	rh_151_2	Rh151c2	Ruapehu	New Zealand	lava	1.57796	0.504696	35.787	35.79	7.11	19.4	39.76	test1679_eurotronic.txt	0.0542921	0.0504465	0.0519879	0.0540882	0.0560118	0.0514619	0.0565523	0.0552694	0.0617359	0.0597172	0.068277	0.0674782	0.0718291	0.0753922	0.075207	0.0768181	0.0770597	0.0793119	0.0811569	0.083751	0.0830807	0.0847947	0.0858399	0.0867978	0.0859831	0.0868536	0.0869807	0.0877727	0.0877777	0.0881732	0.0886539	0.0895957	0.0894986	0.0905114	0.0911893	0.0924905
211	rh_151_3	Rh151c3	Ruapehu	New Zealand	lava	1.54219	0.507737	30.3571	30.16	6.18	19.45	39.82	test1680_eurotronic.txt	0.0600324	0.0548934	0.0586243	0.0588807	0.0600023	0.05799	0.0633413	0.0607214	0.0653319	0.0697604	0.0706147	0.0741552	0.077296	0.079301	0.0810713	0.0823852	0.0850788	0.0845998	0.0877041	0.0875536	0.0891418	0.0903459	0.0905302	0.0916603	0.0913601	0.0920071	0.0927381	0.0927938	0.0927246	0.0931995	0.0934832	0.0940099	0.0944147	0.0950143	0.0961562	0.0963661
212	wh_2c1	Wh2c1	Whakaari	New Zealand	lava	1.89255	0.235999	15.8	15.17	2.75	19.54	42.22	test1696_eurotronic.txt	0.217315	0.243154	0.199808	0.217965	0.227978	0.235174	0.222807	0.232869	0.246612	0.240497	0.253668	0.254987	0.252596	0.258036	0.252868	0.249564	0.249747	0.249964	0.253506	0.255753	0.260628	0.264453	0.268352	0.270304	0.274828	0.276941	0.280491	0.280323	0.280447	0.281897	0.285187	0.285713	0.287978	0.289586	0.292251	0.294057
213	wh_22cc	Wh2c2c	Whakaari	New Zealand	lava	2.5811	0.0422896	153.9	152.50	17.07	20.04	41.27	test1718_eurotronic.txt	0.116826	0.128258	0.112861	0.139866	0.133289	0.12638	0.112988	0.138753	0.118629	0.135676	0.144715	0.138531	0.138475	0.145384	0.151416	0.155531	0.159943	0.1592	0.159957	0.161957	0.162421	0.164391	0.164858	0.163281	0.16322	0.166968	0.163274	0.164862	0.162405	0.166199	0.167171	0.166889	0.168322	0.167722	0.169381	0.170694
214	wh_22ce	Wh2c2e	Whakaari	New Zealand	lava	2.52758	0.0422736	108.6	107.53	14.79	20	40.94	test1719_eurotronic.txt	0.11528	0.122638	0.111634	0.118843	0.11451	0.125122	0.115095	0.11297	0.122821	0.136768	0.13963	0.142427	0.148084	0.141561	0.149389	0.148408	0.154765	0.156718	0.157318	0.161551	0.160768	0.161462	0.160311	0.161584	0.162887	0.162154	0.159419	0.160715	0.16045	0.160951	0.161491	0.16218	0.162206	0.162989	0.163494	0.164289
215	wh_22cf	Wh2c2f	Whakaari	New Zealand	lava	2.56192	0.0218038	112.9	112.03	18.26	19.97	41.4	test1717_eurotronic.txt	0.125007	0.135357	0.148075	0.120211	0.146059	0.132689	0.12844	0.145355	0.145992	0.149474	0.150007	0.160627	0.150608	0.162347	0.162371	0.154383	0.157674	0.160366	0.158213	0.157509	0.156354	0.157962	0.155833	0.155378	0.153688	0.15398	0.15324	0.154168	0.152323	0.149727	0.15219	0.15088	0.151615	0.150476	0.151442	0.15303
216	wh_23c0	Wh23ca	Whakaari	New Zealand	lava	0.888113	0.545493	9.5756	8.86	1.50	19.29	37.67	test1742_eurotronic.txt	0.277201	0.311175	0.295606	0.321935	0.348104	0.360615	0.400435	0.439095	0.469457	0.49875	0.527895	0.553857	0.571915	0.579071	0.597493	0.60618	0.629154	0.63579	0.650412	0.661506	0.667096	0.67429	0.678903	0.684861	0.684925	0.691495	0.692441	0.697313	0.702872	0.701572	0.705802	0.709301	0.710792	0.716717	0.714099	0.714632
217	wh_23ce	Wh2c3e	Whakaari	New Zealand	lava	1.47199	0.360371	17.6	16.67	3.40	19.95	39.98	test1741_eurotronic.txt	0.210033	0.214523	0.211824	0.230924	0.221937	0.207761	0.208103	0.233992	0.232108	0.241334	0.252634	0.256138	0.264431	0.265811	0.276767	0.287623	0.290339	0.299426	0.312811	0.322498	0.333342	0.343485	0.352072	0.361207	0.373343	0.385043	0.394302	0.403486	0.413646	0.421711	0.430454	0.439003	0.444814	0.450773	0.454184	0.458986
218	wh_3c2	Wh3c2	Whakaari	New Zealand	lava	2.22701	0.102306	59.02	59.22	20.38	19.6	40.4	uni_wh3c2_d.txt	0.172447	0.176673	0.158331	0.200516	0.193559	0.189015	0.20809	0.230593	0.22617	0.223594	0.213302	0.219943	0.21701	0.214408	0.215692	0.220708	0.216331	0.218265	0.218438	0.217397	0.218049	0.212987	0.213187	0.215619	0.214905	0.21504	0.214902	0.213099	0.21373	0.21555	0.213155	0.212734	0.213993	0.21224	0.213066	0.212885
219	wh_32cb	Wh3c2b	Whakaari	New Zealand	lava	2.32025	0.123349	57.4	56.84	14.33	19.89	42.85	test1722_eurotronic.txt	0.190223	0.188993	0.183676	0.182653	0.201729	0.189772	0.171264	0.167775	0.166582	0.180106	0.156263	0.152362	0.156063	0.155527	0.151644	0.153305	0.151041	0.152999	0.149714	0.147575	0.146141	0.148451	0.145743	0.145635	0.148116	0.146583	0.146928	0.143887	0.145209	0.144531	0.142531	0.143597	0.143181	0.143391	0.144334	0.144313
220	wh_32ce	Wh3c2e	Whakaari	New Zealand	lava	2.27224	0.157003	48.1	49.66		19.4	39.73	test1721_eurotronic.txt	0.172076	0.172177	0.163876	0.187913	0.176832	0.165434	0.162303	0.159236	0.163479	0.165159	0.164887	0.17037	0.171107	0.168318	0.169082	0.163733	0.165056	0.166939	0.165308	0.162629	0.167438	0.164472	0.162181	0.161586	0.162911	0.160784	0.1604	0.159645	0.159121	0.160089	0.157598	0.158473	0.157928	0.157581	0.158545	0.159982
221	wh_32cg	Wh3c2g	Whakaari	New Zealand	lava	2.42015	0.0719741	57.3	56.23	11.23	20.02	39.54	test1716_eurotronic.txt	0.165945	0.156246	0.150501	0.158246	0.148575	0.153325	0.147979	0.134341	0.147293	0.136573	0.135595	0.144803	0.148492	0.144368	0.147145	0.150238	0.148401	0.153083	0.15126	0.155598	0.153802	0.152538	0.155644	0.155012	0.15473	0.155278	0.150838	0.152846	0.152056	0.152192	0.151111	0.152464	0.151473	0.152895	0.153265	0.154427
222	wh_5c3	Wh5c3	Whakaari	New Zealand	clastic	1.80902	0.244665	85	85.72	12.29	19.58	40.22	test1694_eurotronic.txt	0.283988	0.278134	0.278713	0.291672	0.293277	0.31246	0.323452	0.339679	0.358698	0.374517	0.384199	0.39115	0.406701	0.41616	0.424803	0.429431	0.431902	0.440505	0.44554	0.450203	0.450078	0.452806	0.454346	0.4533	0.454088	0.456407	0.454477	0.457067	0.46022	0.463244	0.467782	0.4715	0.475311	0.479504	0.481828	0.48466
223	wh_5c4	Wh5c4	Whakaari	New Zealand	clastic	1.6052	0.31398	22.1	21.62	4.78	19.46	39.91	test1695_eurotronic.txt	0.272161	0.275407	0.25702	0.27889	0.304551	0.314802	0.319788	0.345269	0.369313	0.383063	0.39545	0.408251	0.42124	0.424052	0.429504	0.435746	0.444786	0.449654	0.456093	0.466912	0.471333	0.472504	0.478134	0.47989	0.480897	0.483905	0.484342	0.488451	0.490437	0.491729	0.494036	0.49742	0.498274	0.500286	0.50104	0.502819
224	wh_6c3	Wh6c3	Whakaari	New Zealand	clastic	1.83314	0.230744	36.7	36.32	7.23	19.62	40.26	test1697_eurotronic.txt	0.258022	0.259398	0.246668	0.249191	0.246783	0.243039	0.242045	0.251598	0.23215	0.239718	0.226481	0.222432	0.226581	0.230519	0.224999	0.227566	0.229731	0.234082	0.236302	0.238393	0.243007	0.248431	0.250942	0.25849	0.261902	0.266318	0.269617	0.271669	0.276282	0.279321	0.283594	0.284233	0.28963	0.292404	0.294219	0.299929
225	wh_7c1	Wh7c1	Whakaari	New Zealand	lava	2.07093	0.122175	44.3	44.01		19.63	40.93	test1734_eurotronic.txt	0.163878	0.178474	0.185393	0.179046	0.175194	0.177053	0.204477	0.208011	0.209051	0.225141	0.225227	0.226313	0.23752	0.23906	0.236657	0.241125	0.236688	0.240368	0.244356	0.249887	0.252079	0.254166	0.257325	0.261502	0.264841	0.263534	0.268013	0.269623	0.272238	0.274396	0.27711	0.27823	0.280069	0.280984	0.282396	0.282507
226	wh_7c5	Wh7c5	Whakaari	New Zealand	lava	2.13317	0.111606	19.3	18.75	5.41	19.52	40.6	test1733_eurotronic.txt	0.186147	0.188652	0.187909	0.195206	0.209717	0.228394	0.228409	0.242276	0.241187	0.259212	0.2627	0.277435	0.283259	0.290164	0.291292	0.310741	0.306936	0.309746	0.319477	0.327971	0.333477	0.336205	0.338108	0.340957	0.341802	0.345095	0.347069	0.351115	0.352714	0.351831	0.357428	0.358562	0.360691	0.359758	0.36096	0.360218
227	wh_7c6	Wh7c6	Whakaari	New Zealand	lava	2.05117	0.139031	52.27	58.37	18.24	19.57	40.74	uni_wh7c6_d.txt	0.177696	0.215757	0.187638	0.202157	0.20123	0.224997	0.225756	0.23454	0.242272	0.271047	0.281997	0.288559	0.296839	0.295659	0.314936	0.317935	0.323048	0.332413	0.340867	0.355656	0.364778	0.377992	0.390708	0.396446	0.40613	0.414164	0.420925	0.427743	0.437924	0.441445	0.449548	0.451644	0.460743	0.463267	0.46825	0.468794
228	wh_7c8	Wh7c8	Whakaari	New Zealand	lava	2.12365	0.10825	52.4	52.46	10.62	19.57	40.17	test1698_eurotronic.txt	0.176148	0.177948	0.171982	0.176141	0.186818	0.199668	0.199487	0.203002	0.210027	0.215205	0.214727	0.224889	0.235782	0.238549	0.246303	0.245615	0.246163	0.244802	0.253074	0.258255	0.260558	0.26449	0.271707	0.272497	0.276949	0.278035	0.280659	0.283793	0.283006	0.286462	0.289674	0.291039	0.291039	0.290649	0.291144	0.292013
229	wh_8c1	Wh8c1	Whakaari	New Zealand	clastic	1.22052	0.481318	4.9	3.95	0.80	19.43	40.57	test1700_eurotronic.txt	0.189203	0.191694	0.185565	0.2092	0.22072	0.235436	0.26147	0.289967	0.298666	0.332093	0.345185	0.354688	0.368442	0.37719	0.386551	0.387648	0.396415	0.399615	0.407242	0.417055	0.42459	0.428199	0.428761	0.432492	0.432791	0.43937	0.440311	0.444924	0.445297	0.446641	0.449993	0.454057	0.454674	0.45644	0.458009	0.457536
230	wh_8c3	Wh8c3	Whakaari	New Zealand	clastic	1.28354	0.430701	5.5	4.63	0.47	19.42	40.38	test1701_eurotronic.txt	0.208153	0.237093	0.201428	0.232953	0.237427	0.228819	0.255292	0.278518	0.297227	0.313679	0.329448	0.342353	0.344414	0.346624	0.356589	0.363132	0.367889	0.379281	0.382668	0.389311	0.394312	0.39838	0.404036	0.406283	0.409512	0.412299	0.414553	0.416782	0.420027	0.421694	0.424474	0.426958	0.428203	0.430363	0.43096	0.431528
231	wh_8c4	Wh8c4	Whakaari	New Zealand	clastic	1.24056	0.469082	5.9	5.06	0.19	19.24	40.18	test1702_eurotronic.txt	0.237729	0.23029	0.234858	0.247097	0.247162	0.273416	0.302133	0.323399	0.336184	0.361971	0.375666	0.390004	0.405738	0.407724	0.413753	0.419541	0.426296	0.434152	0.442695	0.452945	0.459396	0.461733	0.463959	0.468642	0.469876	0.473479	0.4748	0.47638	0.481112	0.481537	0.484491	0.486028	0.487163	0.48925	0.488026	0.489244
232	wh_8c5	Wh8c5	Whakaari	New Zealand	clastic	1.20615	0.482655	4.7	3.82	0.51	19.33	41.27	test1703_eurotronic.txt	0.239033	0.232167	0.240753	0.258664	0.246416	0.265467	0.275274	0.289387	0.309402	0.324562	0.339078	0.348824	0.363583	0.367043	0.367702	0.373071	0.379871	0.383768	0.392735	0.403456	0.404375	0.411983	0.41474	0.418211	0.42114	0.422139	0.426878	0.427661	0.432198	0.431381	0.43427	0.435965	0.438245	0.439054	0.440273	0.438591
233	wh_8c6	Wh8c6	Whakaari	New Zealand	clastic	1.18181	0.492982	4.9	3.97	0.57	19.37	41.55	test1704_eurotronic.txt	0.216867	0.232245	0.230043	0.232591	0.24411	0.249825	0.26695	0.289839	0.304609	0.315928	0.333793	0.33539	0.352145	0.358896	0.365674	0.3701	0.37718	0.382435	0.39352	0.398088	0.409132	0.416956	0.41844	0.426798	0.42752	0.431444	0.432369	0.437426	0.442795	0.442756	0.446862	0.447772	0.448677	0.451852	0.453033	0.452945
234	wh_21cp	Wh21cp	Whakaari	New Zealand	lava	2.31715	0.0803589	77.2	76.26	11.65	19.98	41.85	test1720_eurotronic.txt	0.103914	0.121056	0.100844	0.117015	0.118138	0.117462	0.113513	0.129467	0.136095	0.15041	0.150409	0.158171	0.160354	0.162951	0.172138	0.17223	0.173198	0.172347	0.174413	0.175375	0.175401	0.17516	0.174142	0.17217	0.174356	0.171407	0.172034	0.17198	0.173674	0.173727	0.17289	0.173058	0.173672	0.173184	0.174142	0.174503
235	wh_33cc	Wh33c	Whakaari	New Zealand	lava	1.79743	0.229781	30.6	29.54	5.92	19.99	39.07	test1743_eurotronic.txt	0.21702	0.207421	0.220466	0.212763	0.234452	0.233496	0.247876	0.266592	0.284508	0.306402	0.328608	0.343533	0.351427	0.365732	0.37445	0.380341	0.385022	0.396966	0.402973	0.418576	0.422552	0.431942	0.436786	0.44324	0.445742	0.45116	0.455711	0.466775	0.475746	0.482931	0.492695	0.501807	0.510356	0.522057	0.530738	0.543411
236	wh_103c2	Wh103c2	Whakaari	New Zealand	breccia	2.4236	0.121029	114.7	115.11	17.15	19.74	40.09	test1689_eurotronic.txt	0.164476	0.169619	0.181333	0.191886	0.201193	0.207308	0.219478	0.231789	0.238962	0.25329	0.262642	0.265197	0.270017	0.271347	0.272276	0.275839	0.278525	0.284492	0.276366	0.277447	0.276535	0.280563	0.27454	0.277899	0.275053	0.277363	0.27691	0.276616	0.277051	0.276287	0.274739	0.274673	0.274816	0.275011	0.274807	0.273812
237	wh_103c3	Wh103c3	Whakaari	New Zealand	breccia	2.48821	0.0941074	134.8	136.08	18.51	19.66	40.51	test1690_eurotronic.txt	0.170699	0.17316	0.175993	0.201147	0.190042	0.191	0.193989	0.221364	0.228549	0.24243	0.237998	0.255213	0.262475	0.26211	0.26572	0.267085	0.268482	0.271831	0.26605	0.2695	0.271373	0.272946	0.272055	0.270359	0.267399	0.269573	0.2703	0.268632	0.268491	0.268953	0.267742	0.268768	0.268627	0.268489	0.268397	0.268178
238	wh_103c4	Wh103c4	Whakaari	New Zealand	breccia	2.45986	0.104157	106.4	107.49	17.61	19.59	40.6	test1691_eurotronic.txt	0.165821	0.188152	0.183291	0.170888	0.190585	0.202136	0.202502	0.214779	0.206081	0.228892	0.243634	0.246767	0.253879	0.254031	0.259284	0.262948	0.265036	0.266409	0.266945	0.271739	0.267398	0.269356	0.271176	0.270839	0.271822	0.272472	0.271622	0.271817	0.268943	0.269824	0.270878	0.271535	0.270634	0.271076	0.271335	0.27057
239	wh_103c5	Wh103c5	Whakaari	New Zealand	breccia	2.4149	0.12067	72.2	72.71	14.79	19.56	40.27	test1712_eurotronic.txt	0.166217	0.17935	0.185931	0.179637	0.173369	0.189026	0.180327	0.199811	0.198656	0.204666	0.213473	0.220517	0.227918	0.226387	0.230829	0.233192	0.234256	0.23665	0.237228	0.240539	0.239038	0.237405	0.23966	0.241817	0.239865	0.23975	0.240546	0.239728	0.239267	0.239135	0.23768	0.237894	0.236629	0.237797	0.237321	0.236902
240	wh_103c6	Wh109c6	Whakaari	New Zealand	breccia	2.41174	0.124809	97.6	98.50	15.69	19.6	40.3	test1692_eurotronic.txt	0.171636	0.163593	0.170316	0.172836	0.174923	0.199158	0.185533	0.218992	0.214736	0.222324	0.220211	0.235293	0.242325	0.244678	0.247922	0.250723	0.247762	0.251114	0.252012	0.252358	0.248319	0.251494	0.249023	0.247527	0.247752	0.246703	0.247702	0.247087	0.248709	0.245786	0.246464	0.246622	0.245003	0.245006	0.245133	0.244205
241	wh_103c7	Wh103c7	Whakaari	New Zealand	breccia	2.43654	0.1207	88.6	89.65	18.14	19.52	40.12	test1713_eurotronic.txt	0.190258	0.172062	0.173781	0.186094	0.205266	0.21183	0.22415	0.22256	0.237774	0.255986	0.261943	0.26803	0.276642	0.27986	0.291065	0.28735	0.289854	0.288041	0.289079	0.290221	0.291579	0.289086	0.28821	0.289874	0.289281	0.288047	0.288497	0.288519	0.287947	0.287991	0.286607	0.288111	0.287292	0.286763	0.28648	0.285596
242	wh_103c8	Wh103c8	Whakaari	New Zealand	breccia	2.46845	0.103392	113.3	114.31	18.34	19.64	39.96	test1723_eurotronic.txt	0.159177	0.184156	0.151513	0.170935	0.183705	0.173187	0.189184	0.204359	0.216337	0.228013	0.229735	0.238131	0.242316	0.246142	0.243905	0.251605	0.254723	0.256592	0.253902	0.253932	0.25514	0.253896	0.256908	0.25397	0.256438	0.252338	0.254211	0.255037	0.253591	0.255194	0.253925	0.253693	0.252507	0.252333	0.253312	0.253761
243	wh_103c9	Wh103c9	Whakaari	New Zealand	breccia	2.50237	0.0900935	125.2	126.39	20.82	19.64	40.88	test1724_eurotronic.txt	0.19275	0.194402	0.170592	0.180769	0.197466	0.200448	0.211329	0.224749	0.219867	0.238031	0.243936	0.252849	0.258098	0.262748	0.263488	0.267785	0.269702	0.274933	0.270998	0.274861	0.273088	0.275491	0.275328	0.276317	0.274799	0.274667	0.274024	0.273124	0.274472	0.273991	0.274252	0.274141	0.274145	0.273859	0.273426	0.274556
244	wh_103c10	Wh103c10	Whakaari	New Zealand	breccia	2.44862	0.109936	109.4	110.20	20.23	19.65	40.64	test1725_eurotronic.txt	0.214629	0.186229	0.187043	0.208663	0.213084	0.211714	0.222465	0.224057	0.241727	0.25333	0.2657	0.268676	0.274662	0.279242	0.283032	0.287874	0.293808	0.292594	0.291577	0.298395	0.293457	0.296554	0.29858	0.299182	0.296586	0.29734	0.295887	0.296523	0.297047	0.296214	0.297281	0.297016	0.296383	0.297376	0.297604	0.296239
245	wh_103c11	Wh103c11	Whakaari	New Zealand	breccia	2.46224	0.107861	105.6	106.58	18.64	19.61	40.01	test1693_eurotronic.txt	0.180295	0.15579	0.153275	0.167129	0.186679	0.191515	0.18246	0.188409	0.200207	0.206703	0.214955	0.226035	0.220419	0.230902	0.23182	0.238963	0.240887	0.24211	0.239962	0.245835	0.243876	0.243883	0.244635	0.242182	0.242247	0.241527	0.239956	0.241009	0.244476	0.239786	0.241657	0.241008	0.239153	0.239433	0.239648	0.239157
246	tg_26b_1	tg26bc1	Tongariro	New Zealand	clastic	1.23757	0.595756	5.77817	4.99		18.96	40.48	test1735_eurotronic.txt	0.0640123	0.0571539	0.059573	0.0636128	0.0662503	0.0663836	0.0725978	0.0745429	0.0815559	0.0868364	0.091062	0.0923079	0.0971194	0.101622	0.10499	0.106238	0.111394	0.112423	0.115623	0.118835	0.120021	0.122291	0.125011	0.125733	0.127073	0.127511	0.127875	0.130658	0.130676	0.132224	0.133571	0.133511	0.135292	0.136642	0.137634	0.139177
247	tg_26b_2	tg26bc2	Tongariro	New Zealand	clastic	1.14568	0.635458	6.5845	5.74		19.25	40.73	test1736_eurotronic.txt	0.0667585	0.066611	0.0694313	0.0706797	0.0690816	0.0751703	0.078607	0.0845491	0.0889116	0.0939042	0.0974763	0.0997158	0.103939	0.106909	0.111086	0.113938	0.115536	0.120238	0.122002	0.125635	0.128778	0.130092	0.132124	0.133693	0.134348	0.135421	0.135863	0.137621	0.139066	0.139005	0.140757	0.141279	0.142359	0.143706	0.144607	0.145442
248	tg_29c_3	tg29c3	Tongariro	New Zealand	lava	2.34811	0.109372	85.0893	86.29	16.30	19.47	39.6	test1681_eurotronic.txt	0.0544584	0.056143	0.0648432	0.0644505	0.0645037	0.0729517	0.0734958	0.0773697	0.0836097	0.0902352	0.0939724	0.0959163	0.0990016	0.0999618	0.102734	0.103524	0.108066	0.108631	0.11096	0.111912	0.112537	0.113348	0.113515	0.115022	0.114206	0.114864	0.113806	0.115054	0.115587	0.116168	0.117059	0.116752	0.117236	0.118091	0.118035	0.118733
249	tg_31_1	tg31c1	Tongariro	New Zealand	lava	2.30348	0.132777	65.5169	67.04	11.22	19.22	40.55	test1682_eurotronic.txt	0.0546051	0.0505458	0.0576667	0.0543235	0.063216	0.0651731	0.0659211	0.0738073	0.0811793	0.0828682	0.0835935	0.0849385	0.089633	0.0901629	0.0923762	0.093734	0.0931353	0.0949208	0.0953785	0.0967995	0.0961925	0.0956136	0.0953396	0.0956785	0.0962038	0.095913	0.0961918	0.0969041	0.0958616	0.0958779	0.0963747	0.096319	0.0968579	0.0965434	0.09634	0.0963677
250	tg_31_4	tg31c4	Tongariro	New Zealand	lava	2.42479	0.100628	89.6414	90.64	12.55	19.54	40.86	test1683_eurotronic.txt	0.0406561	0.0415444	0.0473122	0.0508909	0.0487713	0.0530287	0.0593616	0.0652306	0.0676931	0.0717198	0.0757541	0.0811933	0.0826152	0.0857539	0.0883199	0.088453	0.0894322	0.0883315	0.0903437	0.0906466	0.0911085	0.0901062	0.0901583	0.0897098	0.0892295	0.0890447	0.0892431	0.0896188	0.089327	0.089759	0.0895428	0.0896178	0.0896066	0.0895181	0.0899114	0.0893719
251	tg_32_3	tg32c3	Tongariro	New Zealand	lava	2.32813	0.0906183	97.7975	99.32	12.49	19.48	39.96	test1684_eurotronic.txt	0.045155	0.0479746	0.0503771	0.0471075	0.0493417	0.0487882	0.0539129	0.0568392	0.0616165	0.0653061	0.0689317	0.0696456	0.0771327	0.0790495	0.0811589	0.0808837	0.0853895	0.0862451	0.0892645	0.0904223	0.0902954	0.0913158	0.092807	0.0919629	0.092062	0.0932566	0.0926093	0.092678	0.0930266	0.0930618	0.0939221	0.0940939	0.0947968	0.0950734	0.0959416	0.0964939
252	tg_33_1	tg33c1	Tongariro	New Zealand	lava	2.52735	0.0509331	95.525	97.53	16.17	19.37	39.78	test1685_eurotronic.txt	0.0387306	0.0406649	0.0466988	0.0477633	0.0456067	0.0470132	0.0511674	0.0514404	0.0549149	0.0589136	0.0606616	0.0629866	0.0670467	0.0715992	0.0718608	0.0732908	0.0739286	0.0747964	0.0762326	0.0772309	0.0778548	0.0775858	0.0777331	0.0774026	0.0773898	0.0770417	0.0774969	0.0772949	0.077219	0.0775649	0.0773607	0.0774871	0.0778255	0.0774039	0.0776371	0.0775615
253	tg_33_4	tg33c4	Tongariro	New Zealand	lava	2.5273	0.0414374	87.3228	89.75	14.70	19.22	40.55	test1686_eurotronic.txt	0.0400288	0.0352784	0.0432519	0.0326948	0.041264	0.0398874	0.0456231	0.0515091	0.0534087	0.053158	0.0566315	0.0596704	0.0630757	0.0644809	0.0684638	0.0691535	0.0692017	0.07082	0.0706885	0.0719196	0.0710143	0.0710388	0.0711201	0.0708409	0.0705688	0.0706049	0.0703786	0.0710328	0.0708042	0.0704326	0.0705115	0.0710958	0.0708539	0.071112	0.0710623	0.0709422
254	tg_33_5	tg33c5	Tongariro	New Zealand	lava	2.43509	0.0946397	74.8579	75.40	11.88	19.57	39.93	test1687_eurotronic.txt	0.0515606	0.0425178	0.0433351	0.0441004	0.0503807	0.0461809	0.053748	0.0587091	0.0568026	0.0623999	0.0625396	0.0675262	0.0685971	0.0702996	0.0711	0.0710864	0.0745131	0.0742073	0.0760586	0.0759535	0.0756805	0.0763623	0.0750613	0.0759051	0.0759648	0.0752947	0.0753214	0.075714	0.0758294	0.0766266	0.0764486	0.076487	0.0770117	0.0764867	0.0765412	0.0765908
255	tg_34_1	tg34c1	Tongariro	New Zealand	lava	2.4451	0.08754	105.723	106.91	14.25	19.58	39.64	test1688_eurotronic.txt	0.0469918	0.045264	0.045889	0.0517986	0.0452983	0.0512084	0.0480662	0.0537288	0.0569377	0.0607463	0.0599618	0.0641281	0.0638124	0.064327	0.0667521	0.0662888	0.0661834	0.0666443	0.0685439	0.0689853	0.0687814	0.0699598	0.0688334	0.0688135	0.0682806	0.0680313	0.0687551	0.0685573	0.0681587	0.0689691	0.0684228	0.0684588	0.0682891	0.0683711	0.068526	0.0683732
256	tg_49a_1	tg49ac1	Tongariro	New Zealand	lava	2.35878	0.128159	77.1499	77.85	11.16	19.55	40.27	test1711_eurotronic.txt	0.0458279	0.0519785	0.0471908	0.0559794	0.054372	0.0554802	0.0692497	0.0681524	0.0731494	0.0779357	0.0831807	0.0872339	0.0871711	0.0916124	0.0915561	0.0913068	0.0958491	0.0953731	0.0986108	0.0994388	0.100599	0.0991473	0.0987663	0.0999734	0.0990075	0.0988168	0.099456	0.0990654	0.0996799	0.0995928	0.100136	0.100215	0.100378	0.100539	0.101059	0.100357
257	tg_49c_1	tg49cc1	Tongariro	New Zealand	lava	2.43141	0.0895204	83.5619	84.79	19.29	19.46	37.43	test1710_eurotronic.txt	0.0410963	0.0425244	0.0400395	0.0472915	0.0522329	0.0460958	0.0521097	0.053194	0.0545113	0.057345	0.0586688	0.0635121	0.0662124	0.0680437	0.0696235	0.0673764	0.0677891	0.068641	0.07072	0.0701275	0.070854	0.0715824	0.0705425	0.0698785	0.071397	0.0706825	0.0714599	0.0708903	0.0710455	0.0711177	0.0711655	0.0711287	0.0713079	0.0710214	0.071847	0.0712691
258	tg_50a_1	tg50ac1	Tongariro	New Zealand	lava	2.22361	0.126975	63.7595	64.19	12.97	19.53	40.06	test1705_eurotronic.txt	0.0486614	0.0461401	0.061146	0.0468252	0.0545482	0.056022	0.0634522	0.0582442	0.0675062	0.0699311	0.0759374	0.0773741	0.0793905	0.0801821	0.0808136	0.0828957	0.0850621	0.0832734	0.0849889	0.0857997	0.0855424	0.0863362	0.085903	0.0861524	0.0853879	0.0856318	0.0857674	0.086663	0.0862783	0.0860432	0.0860102	0.0862556	0.0857365	0.085807	0.085624	0.0855436
259	tg_50a_2	tg50ac2	Tongariro	New Zealand	lava	2.18542	0.15752	46.0954	46.00	7.83	19.58	40.04	test1706_eurotronic.txt	0.0514868	0.0474563	0.0529504	0.0598765	0.0578668	0.0589387	0.0685679	0.0628016	0.07194	0.0732867	0.0775916	0.0795829	0.082686	0.0856969	0.0869249	0.0894154	0.09109	0.0903711	0.0922739	0.0940205	0.0927256	0.0944347	0.0941055	0.0942133	0.0938663	0.0942877	0.0943903	0.0938028	0.0942088	0.0945398	0.0938081	0.0942499	0.0944518	0.0946585	0.0948592	0.0946211
260	tg_52a_1	tg52ac1	Tongariro	New Zealand	lava	2.557	0.0533218	165.793	167.79	21.48	19.62	40.23	test1708_eurotronic.txt	0.0477895	0.0465187	0.0535683	0.0524642	0.0512268	0.0503888	0.055345	0.0566896	0.0614658	0.0629566	0.0661402	0.0662036	0.0696988	0.0701125	0.0743552	0.073076	0.0769573	0.0757804	0.0767071	0.0769592	0.0776036	0.0777306	0.0768564	0.0764734	0.0759225	0.076336	0.0760232	0.0758539	0.0763104	0.0763901	0.0765442	0.0766517	0.0761678	0.0761184	0.076291	0.0764211
261	tg_52a_2	tg52ac2	Tongariro	New Zealand	lava	2.55889	0.0515886	179.641	181.63	23.24	19.65	39.93	test1709_eurotronic.txt	0.0457865	0.0495261	0.0510687	0.0454731	0.0505864	0.0540928	0.0616909	0.0583158	0.0605023	0.0578578	0.0656569	0.0621551	0.0667293	0.0661448	0.0651935	0.0647903	0.0655541	0.0672291	0.0660819	0.0650956	0.0638726	0.0643384	0.0632556	0.0628913	0.0629626	0.0634202	0.0613599	0.0623105	0.0616949	0.0627012	0.0619018	0.0624141	0.0610685	0.0618321	0.0617515	0.0616284
262	tg_52a_6	tg52ac6	Tongariro	New Zealand	lava	2.55451	0.0512626	174.77	176.86	19.64	19.64	40.34	test1732_eurotronic.txt	0.0328332	0.0339549	0.034057	0.0398606	0.0405654	0.0349273	0.0429042	0.0395207	0.0483373	0.0489414	0.0546468	0.0574019	0.0561831	0.0574421	0.0584676	0.0598588	0.0585448	0.0590323	0.0593881	0.06034	0.0589943	0.0579095	0.0587262	0.0584514	0.0577113	0.0573224	0.0571175	0.0576261	0.0574458	0.0574947	0.0580413	0.0578587	0.0571797	0.0579329	0.0580188	0.0574769
263	tg_52a_7	tg52ac7	Tongariro	New Zealand	lava	2.56057	0.0513483	145.22	147.01	20.15	19.61	40.76	test1728_eurotronic.txt	0.0331165	0.0384002	0.0309468	0.0420325	0.0399605	0.0424794	0.045856	0.0455924	0.0500091	0.0542702	0.0559215	0.062094	0.0645683	0.0625113	0.0643819	0.0649978	0.0670803	0.0655205	0.0677722	0.0679439	0.0677814	0.0679793	0.0672532	0.0675952	0.067297	0.0673645	0.0672596	0.0670004	0.0673241	0.0669887	0.0667334	0.0673881	0.0664928	0.0672401	0.0673233	0.0670896
264	tg_52a_8	tg52ac8	Tongariro	New Zealand	lava	2.56941	0.0449724	132.721	134.40	18.43	19.59	40.77	test1729_eurotronic.txt	0.0313734	0.0406989	0.0374285	0.0354024	0.0395133	0.0421132	0.0406297	0.0424873	0.0477186	0.0498858	0.0543348	0.058298	0.0593451	0.0606565	0.0641496	0.0635266	0.0644832	0.0646486	0.0651818	0.0666028	0.0664086	0.0661008	0.0661014	0.0661126	0.0664087	0.0651692	0.0658971	0.0656939	0.0657245	0.0657186	0.065847	0.066619	0.0662074	0.0663019	0.066107	0.0660054
265	tg_52a_9	tg52ac9	Tongariro	New Zealand	lava	2.49935	0.0679107	72.1608	72.71	13.77	19.56	37.53	test1744_eurotronic.txt	0.0367343	0.0373253	0.0403976	0.0413922	0.0447564	0.0429774	0.0513735	0.0555689	0.0625049	0.0627865	0.0650251	0.0706592	0.0699853	0.0727523	0.073304	0.0743755	0.0768511	0.0798017	0.0804111	0.0813003	0.0826155	0.0834128	0.0833515	0.0829418	0.082721	0.0823018	0.0834159	0.0836648	0.0835912	0.0841825	0.0843584	0.0843359	0.0848776	0.084779	0.0849732	0.0848949
266	tg_52a_10	tg52ac10	Tongariro	New Zealand	lava	2.536	0.0599565	102.546	103.32	20.62	19.64	39.64	test1745_eurotronic.txt	0.0399919	0.0342689	0.0320585	0.0377898	0.0349832	0.0342373	0.0388603	0.0411539	0.046978	0.0484675	0.0476729	0.0491962	0.0502619	0.0549423	0.0547767	0.0551973	0.0564092	0.0564818	0.0572533	0.0586297	0.0591771	0.0580317	0.0583765	0.0585245	0.0597236	0.0593757	0.059119	0.0595216	0.0599833	0.0597257	0.0604756	0.0605316	0.0604894	0.0603619	0.0606251	0.0607209
267	tg_56a_5	tg56ac5	Tongariro	New Zealand	lava	2.28082	0.132613	93.1818	94.15	19.24	19.57	40.47	test1726_eurotronic.txt	0.02731	0.0298656	0.0334837	0.027604	0.0279771	0.0316876	0.0305847	0.0314217	0.0327401	0.0313801	0.032897	0.0345404	0.0347742	0.036213	0.0379068	0.037026	0.0382518	0.0370265	0.0381383	0.0374464	0.0376141	0.0371347	0.0375087	0.0364007	0.0369017	0.0368188	0.0361311	0.0362841	0.0360009	0.0361866	0.0358123	0.0362083	0.035776	0.0356123	0.0357952	0.0355555
268	tg_56a_6	tg56ac6	Tongariro	New Zealand	lava	2.34365	0.109387	101.852	102.92	22.45	19.58	40.64	test1727_eurotronic.txt	0.0282863	0.0262783	0.0288928	0.027522	0.0259662	0.0295295	0.0300996	0.0372123	0.0376916	0.0360041	0.0380321	0.0442904	0.0437131	0.0460382	0.0458671	0.0467981	0.0474845	0.0475236	0.0479874	0.0463162	0.0465262	0.0468105	0.0460206	0.0450021	0.0454831	0.0449609	0.0446168	0.0446245	0.0444015	0.0444841	0.0442479	0.0440686	0.0435481	0.0435948	0.0434397	0.0432747
269	tg_56b_1	tg56bc1	Tongariro	New Zealand	clastic	1.27398	0.518803	9.76383	9.00	2.88	19.44	39.46	test1707_eurotronic.txt	0.0337207	0.0296988	0.024012	0.0255203	0.0311793	0.0212727	0.0265766	0.0267824	0.023453	0.0264143	0.0239478	0.0278014	0.0258563	0.0275047	0.0274951	0.0263082	0.026128	0.0260469	0.0269563	0.0255197	0.025599	0.0251307	0.0246351	0.023698	0.0236436	0.0231279	0.0233657	0.0235689	0.022869	0.0226033	0.0227085	0.0221594	0.0220208	0.0217405	0.021945	0.0217235
270	tg_56b_2	tg56bc2	Tongariro	New Zealand	clastic	1.18807	0.549858	14.3435	13.70	4.18	19.45	43.57	test1750_eurotronic.txt	0.0234366	0.0234283	0.0273754	0.0251973	0.0238032	0.0229089	0.026433	0.0227483	0.0249725	0.023581	0.0264854	0.0252221	0.0252726	0.0261285	0.0276117	0.0277395	0.0274687	0.0277177	0.0272617	0.0269461	0.0265464	0.0255554	0.0259827	0.025583	0.0250989	0.0250721	0.024519	0.0251083	0.0243332	0.0247627	0.0247006	0.0242744	0.0239061	0.0237751	0.0238567	0.0235621
271	tg_56b_3	tg56bc3	Tongariro	New Zealand	clastic	1.11919	0.571344				19.35	32.78	-	0.0352205	0.0326412	0.033957	0.0319841	0.0276747	0.0281172	0.0286702	0.0216702	0.02535	0.0241642	0.0277583	0.0266248	0.0270893	0.0281242	0.0280453	0.0274041	0.0269273	0.028925	0.0278612	0.0277972	0.026825	0.0272801	0.0269904	0.0263309	0.0260593	0.0257771	0.0261389	0.0263567	0.0254955	0.0255885	0.0255459	0.0252421	0.0252223	0.0250227	0.0246898	0.0249556
272	tg_56b_4	tg56bc4	Tongariro	New Zealand	clastic	1.33603	0.493356	13.4644	12.77	4.32	19.49	39.45	test1737_eurotronic.txt	0.0258964	0.0259795	0.0301224	0.0244225	0.028246	0.0299675	0.0309407	0.0259585	0.0240347	0.0266316	0.0274086	0.0277751	0.0270549	0.0294646	0.0289149	0.0313098	0.0290069	0.030282	0.0291684	0.028513	0.0283037	0.0278026	0.0284071	0.0263956	0.0272186	0.026648	0.0271159	0.0267563	0.0260451	0.0263488	0.025961	0.026067	0.0259982	0.0258514	0.0258756	0.0258822
273	tg_56b_5	tg56bc5	Tongariro	New Zealand	clastic	1.32946	0.491725				19.38	32.87	-	0.0262568	0.0285985	0.0247382	0.029172	0.0202804	0.0217387	0.0217029	0.0256383	0.0265396	0.0231372	0.0308117	0.0271763	0.0289116	0.0281685	0.0313239	0.0327074	0.0315798	0.0330726	0.0307317	0.0308614	0.0309846	0.0300338	0.0289436	0.0281569	0.029367	0.0293173	0.0282383	0.027889	0.0268328	0.0273597	0.0271046	0.0267146	0.0266892	0.0258796	0.0264279	0.0260098
274	tg_56b_6	tg56bc6	Tongariro	New Zealand	clastic	1.30161	0.502479	12.9681	12.28	5.16	19.45	39.04	test1738_eurotronic.txt	0.0401106	0.0375881	0.0316564	0.031826	0.0320869	0.0310826	0.033861	0.0336553	0.0337928	0.0307712	0.0326856	0.0315405	0.0329592	0.0340488	0.0313846	0.0325957	0.0313517	0.0306344	0.0297856	0.0302908	0.0294433	0.0289066	0.0285212	0.028535	0.0280566	0.0280113	0.0271221	0.0271185	0.0268669	0.0267156	0.0265574	0.0263149	0.0262229	0.0258878	0.0257642	0.025947
275	tg_56b_7	tg56bc7	Tongariro	New Zealand	clastic	1.27577	0.519033	10.7896	10.00	4.52	19.54	38.7	test1739_eurotronic.txt	0.0234459	0.0257342	0.029838	0.0262034	0.0247642	0.0230362	0.0241118	0.0272269	0.0276425	0.0301507	0.0272687	0.027748	0.0294924	0.0291997	0.0312945	0.0309255	0.030185	0.0290683	0.0299852	0.0298261	0.0296582	0.0295619	0.0287528	0.0293364	0.0290947	0.0282906	0.0279063	0.0278955	0.0278573	0.0276078	0.0274259	0.0271397	0.0268485	0.0271494	0.027258	0.0266227
276	tg_56b_8	tg56bc8	Tongariro	New Zealand	clastic	1.08272	0.586306	6.96452			19.48	38.08		0.0297782	0.0250503	0.0343925	0.0286376	0.0227471	0.0247293	0.020787	0.0260453	0.0233417	0.0255018	0.0239324	0.0234422	0.0250344	0.0284461	0.0260093	0.027373	0.0261089	0.026729	0.0264382	0.0265021	0.026636	0.0257558	0.0253691	0.026132	0.0252802	0.0247738	0.0249788	0.0247052	0.0245053	0.0245491	0.0240548	0.0241912	0.0240902	0.0237848	0.0237205	0.0236437
277	v_cmx1	CMXc1	Volvic	France	lava	2.32645	0.19	65.1	65.14	13.44	20	40	uni_CMX1_d.txt	0.4659	0.441533	0.410199	0.431381	0.409356	0.414038	0.405689	0.401442	0.379144	0.373406	0.378465	0.391203	0.379368	0.382432	0.383484	0.379205	0.381231	0.380771	0.374229	0.374529	0.373633	0.372629	0.367426	0.365632	0.366137	0.363774	0.3656	0.362414	0.361767	0.364306	0.362618	0.362387	0.361732	0.361433	0.361978	0.361746
278	v_cmx2	CMXc2	Volvic	France	lava	2.46169	0.143	76.6	76.60	17.79	20	40	uni_CMX2_d.txt	0.435392	0.327317	0.342102	0.382111	0.399324	0.370968	0.39144	0.366289	0.342502	0.352274	0.370723	0.382959	0.383822	0.377842	0.386062	0.391927	0.380319	0.385254	0.385658	0.387935	0.383581	0.383598	0.380145	0.380686	0.38002	0.381829	0.380449	0.380432	0.379605	0.381185	0.380174	0.38065	0.377721	0.379949	0.377489	0.381319
279	v_cmx3	CMXc3	Volvic	France	lava	2.39283	0.168	67.4	68.89	14.71	20	40	uni_CMX3_d.txt	0.407314	0.391187	0.389372	0.371125	0.361014	0.367473	0.365509	0.362447	0.365154	0.373317	0.373321	0.37286	0.388392	0.390545	0.379453	0.382479	0.376905	0.380017	0.371795	0.378564	0.37339	0.371749	0.370822	0.371093	0.368272	0.37154	0.370921	0.373854	0.370645	0.374043	0.371624	0.369747	0.370428	0.37113	0.370255	0.371067
280	v_cmy1	CMYc1	Volvic	France	lava	2.41818	0.151	74.8	74.79	14.46	20	40	uni_CMY1_d.txt	0.433814	0.416888	0.45466	0.400694	0.416323	0.426418	0.396759	0.372378	0.37764	0.383682	0.363632	0.37588	0.392397	0.378453	0.388297	0.389025	0.384525	0.378344	0.376436	0.379188	0.374833	0.372706	0.372689	0.375497	0.366491	0.371753	0.370372	0.370989	0.36933	0.367297	0.37227	0.371091	0.371435	0.370425	0.369612	0.368813
281	v_cmy2	CMYc2	Volvic	France	lava	2.376	0.168	78.2	78.23	14.70	20	40	uni_CMY2_d.txt	0.334352	0.323554	0.318263	0.311014	0.321739	0.332905	0.318603	0.321441	0.333459	0.341761	0.341136	0.340713	0.349668	0.346303	0.359359	0.36348	0.360369	0.362827	0.364997	0.367454	0.362932	0.363791	0.365388	0.36245	0.364594	0.364876	0.362362	0.363815	0.362373	0.362667	0.363545	0.366516	0.365537	0.366228	0.366099	0.365802
282	v_cmy3	CMYc3	Volvic	France	lava	2.41185	0.157	77	77.01	16.32	20	40	uni_CMY3_d.txt	0.25294	0.285523	0.290663	0.274395	0.309246	0.288733	0.307189	0.300634	0.331249	0.328461	0.320267	0.333902	0.350149	0.345979	0.356357	0.363712	0.363995	0.363845	0.367567	0.36634	0.363853	0.364516	0.364541	0.364362	0.36314	0.363274	0.363755	0.363293	0.363723	0.362979	0.366574	0.36549	0.364944	0.366179	0.366081	0.365281
283	v_cmz1	CMZc1	Volvic	France	lava	2.47583	0.133	76.5	76.51	14.99	20	40	uni_CMZ1_d.txt	0.277202	0.31122	0.272958	0.298823	0.298236	0.295689	0.304163	0.291577	0.30936	0.331154	0.333818	0.344348	0.34985	0.353791	0.367742	0.37628	0.3707	0.375052	0.379581	0.376688	0.374383	0.377547	0.376116	0.375866	0.375482	0.376548	0.377307	0.376967	0.376673	0.374702	0.37817	0.379696	0.377659	0.381932	0.381027	0.379351
284	v_cmz2	CMZc2	Volvic	France	lava	2.37185	0.169	50.7	50.68	11.65	20	40	uni_CMZ2_d.txt	0.317198	0.325994	0.311854	0.30116	0.3028	0.323178	0.30854	0.320236	0.329957	0.344322	0.344414	0.356407	0.359956	0.37536	0.38471	0.378824	0.382986	0.387494	0.387852	0.38603	0.38687	0.384535	0.385608	0.385465	0.382667	0.384529	0.384079	0.383669	0.384551	0.384928	0.385924	0.384849	0.385506	0.38618	0.385589	0.385786
285	v_cmz3	CMZc3	Volvic	France	lava	2.32604	0.185	55.4	55.44	11.10	20	40	uni_CMZ3_d.txt	0.288446	0.375809	0.351202	0.349645	0.381811	0.349586	0.36335	0.34848	0.37356	0.364101	0.369682	0.379371	0.381636	0.375653	0.388578	0.388407	0.390192	0.388581	0.396607	0.396393	0.398297	0.395849	0.389901	0.394337	0.391638	0.389577	0.393237	0.390035	0.390841	0.389819	0.390742	0.391907	0.391277	0.390625	0.390038	0.389512
286	v_csbx1	CSBXc1	Volvic	France	lava	1.84072	0.359							0.282552	0.283528	0.237268	0.262107	0.280084	0.26738	0.254704	0.258572	0.276604	0.265592	0.282503	0.274751	0.277697	0.271655	0.27833	0.276865	0.275045	0.278847	0.278616	0.278738	0.281855	0.278441	0.279896	0.278248	0.278953	0.278924	0.278542	0.279948	0.279779	0.27869	0.280101	0.27881	0.278581	0.278932	0.280463	0.281056
287	v_csbx2	CSBXc2	Volvic	France	lava	1.91744	0.333	30	30.00	6.62	20	40	uni_CSBX2_d.txt	0.27984	0.258009	0.259819	0.25302	0.275651	0.256278	0.256773	0.258169	0.271905	0.26306	0.259665	0.26309	0.272503	0.271908	0.281153	0.278632	0.276242	0.275834	0.271679	0.280741	0.278198	0.275389	0.27402	0.27448	0.272373	0.275515	0.27517	0.278527	0.275311	0.275104	0.27638	0.276189	0.275546	0.277205	0.27754	0.276695
288	v_csbx3	CSBXc3	Volvic	France	lava	1.92754	0.33	35.9	35.94	7.51	20	40	uni_CSBX3_d2.txt	0.261903	0.282745	0.261601	0.2529	0.286354	0.279561	0.264906	0.266729	0.266488	0.269778	0.274071	0.272241	0.271357	0.275014	0.277638	0.278937	0.275568	0.278015	0.277094	0.277284	0.277475	0.276033	0.27594	0.276285	0.275634	0.273775	0.274438	0.274341	0.275194	0.274473	0.27636	0.275347	0.276218	0.275646	0.276068	0.276297
289	v_csby1	CSBYc1	Volvic	France	lava	1.87209	0.35	27.7	27.71	6.18	20	40	uni_CSBY1_d.txt	0.404113	0.461791	0.372844	0.379959	0.399647	0.377138	0.344891	0.334496	0.32428	0.321804	0.300535	0.302108	0.304937	0.296658	0.284147	0.287918	0.280091	0.282381	0.280825	0.274277	0.275292	0.273274	0.268562	0.268676	0.266694	0.267248	0.267042	0.266151	0.265406	0.263745	0.26535	0.262796	0.262907	0.263567	0.264919	0.265052
290	v_csby2	CSBYc2	Volvic	France	lava	1.86404	0.35	27.7	27.70	6.20	20	40	uni_CSBY2_d.txt	0.366095	0.359011	0.369128	0.337013	0.346595	0.327397	0.315036	0.320698	0.293535	0.282424	0.287004	0.274979	0.292682	0.286529	0.275653	0.273761	0.277425	0.279717	0.271252	0.272169	0.273305	0.272617	0.269559	0.26817	0.270399	0.26731	0.26931	0.269823	0.268836	0.26915	0.26983	0.269514	0.268745	0.269876	0.271842	0.270146
291	v_csby3	CSBYc3	Volvic	France	lava	1.90202	0.336	29.5	29.51	6.48	20	40	uni_CSBY3_d.txt	0.319319	0.299264	0.31073	0.26314	0.320555	0.307113	0.296374	0.289177	0.286237	0.292484	0.290323	0.287367	0.292213	0.299136	0.295378	0.291416	0.290656	0.294672	0.295706	0.295805	0.29175	0.289869	0.290871	0.290197	0.290859	0.290978	0.286112	0.289106	0.289245	0.290485	0.289276	0.2899	0.290906	0.290868	0.290428	0.289941
292	v_csbz1	CSBZc1	Volvic	France	lava	1.98093	0.314	33.7	33.69	6.88	20	40	uni_CSBZ1_d.txt	0.375003	0.369184	0.343834	0.308943	0.322466	0.319193	0.321398	0.335647	0.332541	0.319007	0.314352	0.326566	0.31765	0.32512	0.326081	0.323795	0.323843	0.320808	0.321882	0.325209	0.322068	0.321297	0.322052	0.319731	0.319428	0.320796	0.319493	0.320685	0.321551	0.320574	0.321679	0.32083	0.321139	0.321733	0.322834	0.323423
293	v_csbz2	CSBZc2	Volvic	France	lava	1.87414	0.345	25.1	25.11	5.42	20	40	uni_CSBZ2_d.txt	0.42518	0.415354	0.391599	0.363494	0.388559	0.351127	0.353138	0.330933	0.323237	0.313169	0.309894	0.304294	0.302055	0.298246	0.30618	0.301152	0.29839	0.295263	0.295607	0.288743	0.287835	0.291714	0.287549	0.284133	0.285531	0.286343	0.286519	0.284306	0.286295	0.285039	0.285788	0.285393	0.285262	0.286438	0.286754	0.286819
294	v_csbz3	CSBZc3	Volvic	France	lava	1.88584	0.344	26.9	26.91	6.00	20	40	uni_CSBZ3_d.txt	0.446415	0.479593	0.408032	0.426605	0.400778	0.415511	0.406203	0.370958	0.360297	0.348876	0.342772	0.344884	0.337411	0.338415	0.334059	0.330713	0.330144	0.33272	0.329053	0.32111	0.321708	0.323254	0.321838	0.317483	0.319647	0.318396	0.317175	0.316945	0.315765	0.315312	0.313285	0.315735	0.314369	0.312191	0.31347	0.312644
295	v_mdx1	MDXc1	Volvic	France	lava	2.26572	0.199	90.9	90.94	19.38	20	40	uni_MDX1_d.txt	0.287805	0.297887	0.285156	0.283943	0.301898	0.316316	0.289499	0.311066	0.322723	0.325855	0.321461	0.325858	0.324208	0.325696	0.333806	0.332909	0.335971	0.331534	0.339608	0.335774	0.334939	0.334758	0.336878	0.335404	0.335785	0.335386	0.336631	0.336536	0.340157	0.337512	0.338605	0.338505	0.340811	0.339617	0.341296	0.343237
296	v_mdx2	MDXc2	Volvic	France	lava	2.26968	0.2	87.1	87.13	20.14	20	40	uni_MDX2_d_encore.txt	0.26246	0.305785	0.325902	0.27727	0.295963	0.303846	0.316248	0.342771	0.354871	0.356629	0.357813	0.363092	0.368044	0.376614	0.386041	0.381404	0.389762	0.392959	0.391483	0.39033	0.391895	0.38916	0.391964	0.391612	0.388884	0.392834	0.391873	0.393107	0.392937	0.394111	0.396698	0.396889	0.397445	0.399172	0.400434	0.40066
297	v_mdx3	MDXc3	Volvic	France	lava	2.26632	0.205	87.9	87.86	18.36	20	40	uni_MDX3_d.txt	0.265879	0.249417	0.278567	0.26944	0.299479	0.302756	0.304062	0.32294	0.326983	0.3314	0.340232	0.341394	0.35057	0.366396	0.360667	0.363526	0.364792	0.368925	0.372285	0.372857	0.370483	0.367393	0.371129	0.374212	0.368668	0.372619	0.373465	0.373085	0.373972	0.375944	0.377494	0.379659	0.377937	0.380583	0.379803	0.381367
298	v_mdy1	MDYc1	Volvic	France	lava	2.26527	0.205	75.8	75.79	16.53	20	40	uni_MDY1_d.txt	0.254854	0.275854	0.287372	0.252477	0.275198	0.297317	0.298935	0.300628	0.309327	0.31823	0.331853	0.318268	0.327467	0.331534	0.329352	0.336627	0.327609	0.335579	0.336622	0.341581	0.335781	0.338301	0.33954	0.339232	0.337151	0.340664	0.337598	0.341402	0.341466	0.340319	0.341823	0.342471	0.343636	0.346359	0.346183	0.346824
299	v_mdy2	MDYc2	Volvic	France	lava	2.2576	0.207							0.289679	0.307705	0.322925	0.2816	0.304753	0.319904	0.307261	0.303572	0.325786	0.307899	0.311655	0.320244	0.319728	0.333518	0.326478	0.332461	0.330877	0.331404	0.332466	0.330127	0.331814	0.332034	0.330675	0.331772	0.329417	0.332654	0.334337	0.332673	0.333849	0.333197	0.335436	0.335465	0.337265	0.338243	0.337837	0.337651
300	v_mdy3	MDYc3	Volvic	France	lava	2.26912	0.204	82.6	82.59	17.39	20	40	uni_MDY3_d.txt	0.249439	0.289155	0.292784	0.252216	0.266993	0.291175	0.280564	0.302829	0.315327	0.331566	0.335753	0.331822	0.338615	0.348527	0.343483	0.352322	0.35664	0.357638	0.353206	0.356349	0.356437	0.3561	0.356261	0.359197	0.35776	0.360231	0.358041	0.359627	0.358887	0.359505	0.360968	0.361972	0.364541	0.36478	0.364082	0.365428
301	v_mdz1	MDZc1	Volvic	France	lava	2.2814	0.198	71.7	71.68	15.93	20	40	uni_MDZ1_d.txt	0.232254	0.269207	0.285187	0.280636	0.29494	0.301306	0.310644	0.326861	0.334482	0.342778	0.347448	0.357832	0.356313	0.361576	0.364936	0.371174	0.369465	0.374973	0.375311	0.374442	0.374352	0.374528	0.37206	0.377536	0.374359	0.374166	0.374257	0.375948	0.37501	0.376319	0.377504	0.37787	0.377187	0.378173	0.37901	0.379251
302	v_mdz2	MDZc2	Volvic	France	lava	2.27376	0.202	76.2	76.20	16.77	20	40	uni_MDZ2_d.txt	0.249752	0.25449	0.300079	0.275757	0.327301	0.317714	0.334553	0.33935	0.350014	0.352558	0.379224	0.357795	0.382145	0.387887	0.392518	0.39044	0.390268	0.400613	0.402299	0.404745	0.400024	0.404604	0.405358	0.405953	0.404248	0.406769	0.406245	0.408846	0.408634	0.40614	0.410672	0.411259	0.412283	0.411686	0.413415	0.415192
303	v_mdz3	MDZc3	Volvic	France	lava	2.26886	0.203	70.9	70.88	17.11	20	40	uni_MDZ3_d.txt	0.279705	0.296454	0.288184	0.27487	0.278493	0.326756	0.316758	0.33145	0.326278	0.337779	0.346381	0.34808	0.351327	0.363773	0.362074	0.371975	0.370198	0.375918	0.371033	0.374079	0.374182	0.37715	0.374065	0.373771	0.375448	0.376761	0.374413	0.378042	0.377898	0.377191	0.37917	0.379989	0.380224	0.382526	0.381146	0.381933
304	v_vbx1	VBXc1	Volvic	France	lava	2.04626	0.259	38.6	46.56	10.26	20	40	uni_VBX1_d.txt	0.279233	0.285532	0.295985	0.303032	0.303386	0.314273	0.310239	0.311595	0.321976	0.328582	0.333323	0.338583	0.340203	0.337087	0.353363	0.345772	0.352058	0.358021	0.355535	0.358217	0.357287	0.358556	0.3571	0.359161	0.35776	0.359247	0.360743	0.359458	0.360784	0.361685	0.361627	0.364384	0.365157	0.365908	0.365476	0.366569
305	v_vbx2	VBXc2	Volvic	France	lava	2.05216	0.259	56.8	56.76	11.29	20	40	uni_VBX2_d.txt	0.30228	0.307884	0.320727	0.280927	0.303985	0.309025	0.305548	0.314768	0.321549	0.339335	0.342079	0.335269	0.345282	0.345915	0.357404	0.353857	0.355801	0.357798	0.359591	0.35801	0.358848	0.35824	0.357111	0.358963	0.360226	0.359248	0.359517	0.359761	0.362727	0.362151	0.364068	0.364053	0.364038	0.365887	0.366156	0.367469
306	v_vbx3	VBXc3	Volvic	France	lava	2.06803	0.251	57.9	57.88	11.71	20	40	uni_VBX3_d.txt	0.308738	0.301299	0.30334	0.287598	0.298269	0.323289	0.308314	0.308071	0.321399	0.331458	0.337436	0.331034	0.345738	0.349079	0.357231	0.352393	0.350948	0.355543	0.359145	0.358206	0.358007	0.357649	0.357502	0.359626	0.358064	0.360599	0.36196	0.361862	0.360056	0.361827	0.362676	0.364029	0.364234	0.365952	0.364949	0.36555
307	v_vby1	VBYc1	Volvic	France	lava	2.12548	0.228	65.7	65.69	12.64	20	40	uni_VBY1_d.txt	0.396208	0.376354	0.400148	0.365637	0.404795	0.390923	0.386485	0.37771	0.374206	0.372942	0.37935	0.371731	0.374578	0.372819	0.373071	0.370244	0.372622	0.375643	0.370996	0.371072	0.367206	0.368768	0.367329	0.365541	0.363349	0.366201	0.366474	0.366106	0.366643	0.365953	0.366979	0.366052	0.367235	0.366486	0.366742	0.367626
308	v_vbz1	VBZc1	Volvic	France	lava	2.09384	0.242	43.5	43.53	8.20	20	40	uni_VBZ1_d.txt	0.325307	0.302836	0.342971	0.320547	0.296487	0.33272	0.317006	0.31376	0.332113	0.318793	0.334841	0.329049	0.332492	0.333631	0.338475	0.340764	0.336616	0.345991	0.344456	0.337573	0.339007	0.33875	0.342616	0.340499	0.341006	0.341545	0.340575	0.341961	0.342159	0.340657	0.34084	0.344187	0.344651	0.345246	0.34473	0.34512
309	v_vbz2	VBZc2	Volvic	France	lava	2.08713	0.242	41.2	41.21	8.45	20	40	uni_VBZ2_d.txt	0.349954	0.364354	0.313299	0.329486	0.338041	0.332605	0.328972	0.323016	0.342118	0.346408	0.345084	0.356381	0.340441	0.362466	0.354986	0.353572	0.350993	0.349642	0.353727	0.353499	0.351093	0.348529	0.3502	0.3482	0.34743	0.349087	0.347239	0.34721	0.348611	0.349472	0.349829	0.349479	0.34892	0.348861	0.349443	0.349484
310	v_vbz3	VBZc3	Volvic	France	lava	2.08138	0.244	36.6	36.64	7.85	20	40	uni_VBZ3_d.txt	0.277574	0.272744	0.315787	0.292806	0.305651	0.327572	0.307595	0.326297	0.335299	0.341778	0.35627	0.360446	0.368067	0.356927	0.377694	0.363269	0.36838	0.380803	0.378019	0.374782	0.376688	0.376052	0.377842	0.37626	0.377314	0.37568	0.377139	0.378088	0.381294	0.379307	0.379734	0.380002	0.381465	0.382709	0.383952	0.383451
311	v_vsx1	VSXc1	Volvic	France	lava	2.2374	0.187	84.9	84.95	14.56	20	40	uni_VSX1_d.txt	0.284637	0.28842	0.299668	0.299229	0.305799	0.322786	0.306929	0.305675	0.307714	0.317135	0.317633	0.321171	0.329394	0.323988	0.333452	0.328983	0.333738	0.333141	0.329706	0.336566	0.33459	0.337672	0.334391	0.335394	0.336444	0.337617	0.335862	0.339025	0.336195	0.338237	0.338003	0.33777	0.337968	0.339667	0.339113	0.341075
312	v_vsx2	VSXc2	Volvic	France	lava	2.21358	0.198	78.7	78.71	13.75	20	40	uni_VSX2_d.txt	0.350289	0.345415	0.324787	0.341288	0.330549	0.322657	0.331289	0.324696	0.321575	0.346151	0.337472	0.338937	0.332222	0.338354	0.345977	0.349381	0.343475	0.344184	0.341701	0.346216	0.345255	0.343474	0.344003	0.342253	0.342208	0.343748	0.342304	0.341387	0.343826	0.342688	0.34443	0.342847	0.344259	0.345293	0.346164	0.345813
313	v_vsx3	VSXc3	Volvic	France	lava	2.23303	0.191	82.4	82.36	14.07	20	40	uni_VSX3_d.txt	0.309969	0.294108	0.330803	0.309036	0.31542	0.331584	0.312021	0.331006	0.319276	0.322485	0.31905	0.322693	0.333881	0.329292	0.329935	0.31902	0.322793	0.322767	0.321878	0.328578	0.323408	0.323205	0.320342	0.322043	0.321308	0.3194	0.319458	0.318927	0.321947	0.32088	0.319854	0.320052	0.320219	0.322776	0.321248	0.322654
314	v_vsy1	VSYc1	Volvic	France	lava	2.22203	0.195	83.1	83.13	13.10	20	40	uni_VSY1_d.txt	0.312699	0.338349	0.307608	0.305466	0.315241	0.302328	0.333601	0.322059	0.309398	0.32623	0.32257	0.334789	0.327746	0.326631	0.325467	0.324654	0.334055	0.335387	0.331923	0.331414	0.330248	0.331696	0.329067	0.330596	0.328252	0.329134	0.330178	0.329086	0.330475	0.32881	0.33147	0.3291	0.329601	0.331813	0.332343	0.334053
315	v_vsy2	VSYc2	Volvic	France	lava	2.23034	0.192	91	91.00	13.84	20	40	uni_VSY2_d.txt	0.337181	0.316625	0.335352	0.319509	0.314354	0.298564	0.304832	0.313976	0.304542	0.323448	0.321329	0.318888	0.328438	0.322404	0.316707	0.32334	0.314181	0.320696	0.323899	0.318936	0.320054	0.318041	0.318004	0.31914	0.319004	0.316425	0.316681	0.319626	0.31935	0.315994	0.317897	0.320147	0.318533	0.319283	0.320583	0.32044
316	v_vsy3	VSYc3	Volvic	France	lava	2.22515	0.193	87.3	87.30	14.76	20	40	uni_VSY3_d.txt	0.332993	0.333959	0.318607	0.325489	0.350262	0.364645	0.336887	0.3678	0.36521	0.372222	0.373463	0.37135	0.386722	0.383558	0.382765	0.37622	0.373367	0.375834	0.378735	0.37365	0.366742	0.368354	0.369258	0.369687	0.371688	0.370499	0.370391	0.370241	0.369768	0.366893	0.36786	0.368783	0.371316	0.371512	0.369163	0.37086
317	v_vsz1	VSZc1	Volvic	France	lava	2.21911	0.196	70	69.95	12.00	20	40	uni_VSZ1_d.txt	0.368247	0.313421	0.346692	0.352788	0.3621	0.339951	0.338996	0.345963	0.347199	0.360189	0.358831	0.356353	0.362924	0.365824	0.369003	0.371418	0.361965	0.367808	0.367007	0.369671	0.366863	0.368157	0.366728	0.367779	0.367362	0.367609	0.367014	0.368906	0.368416	0.367801	0.371926	0.368807	0.371242	0.371494	0.371702	0.373381
318	v_vsz2	VSZc2	Volvic	France	lava	2.23375	0.191	57.7	57.65	11.37	20	40	uni_VSZ2_d.txt	0.440394	0.377439	0.408985	0.386673	0.397806	0.384469	0.378597	0.380281	0.367904	0.376483	0.388216	0.372258	0.384201	0.381928	0.379662	0.379026	0.384751	0.379865	0.386128	0.386127	0.382242	0.387415	0.381871	0.384139	0.385648	0.3839	0.385664	0.382032	0.385812	0.382913	0.385449	0.386949	0.386379	0.387745	0.389018	0.38813
319	v_vsz3	VSZc3	Volvic	France	lava	2.19273	0.207	58.5	58.50	11.04	20	40	uni_VSZ3_d.txt	0.324938	0.332579	0.325057	0.316736	0.346795	0.355154	0.305113	0.328387	0.324582	0.337026	0.342932	0.333475	0.342093	0.348722	0.347636	0.348091	0.345665	0.350638	0.349883	0.351522	0.3486	0.351953	0.350102	0.350304	0.351106	0.350562	0.348627	0.352962	0.350307	0.351657	0.35304	0.352631	0.354294	0.355914	0.356659	0.355174
320	o_2C_1	012Cc1	Ohakuri	New Zealand	clastic	1.351	0.43	9.4	9.38	1.08	20	40	uni_OI_2C_1.txt	0.54675	0.519915	0.535278	0.58055	0.58871	0.630159	0.67316	0.718703	0.754635	0.794614	0.809944	0.842224	0.86486	0.883615	0.893019	0.911286	0.933368	0.949916	0.961325	0.976523	0.986227	1.00323	1.00458	1.01127	1.01632	1.02176	1.0222	1.02688	1.03494	1.03692	1.03715	1.04592	1.04864	1.05752	1.05876	1.06712
321	o_2C_2	012Cc2	Ohakuri	New Zealand	clastic	0.993	0.58	4	3.97	0.60	20	40	uni_OI_2C_2.txt	0.536798	0.539436	0.552784	0.569867	0.592205	0.634156	0.66485	0.695884	0.725191	0.760579	0.767317	0.803652	0.834235	0.83898	0.865803	0.879774	0.895495	0.909247	0.922219	0.933804	0.947567	0.955634	0.965568	0.969866	0.972898	0.974638	0.975056	0.983576	0.987997	0.988811	0.998852	1.00269	1.00638	1.0136	1.0177	1.02477
322	o_2D_1	012Dc1	Ohakuri	New Zealand	clastic	1.576	0.39	33.2	33.22	12.36	20	40	uni_OI_2D_1.txt	0.483362	0.452113	0.449969	0.450753	0.40933	0.425309	0.422716	0.39743	0.4054	0.410612	0.411819	0.410844	0.414222	0.433435	0.429138	0.441358	0.449223	0.456343	0.463964	0.472269	0.477161	0.484568	0.49205	0.493861	0.498776	0.500573	0.502084	0.504034	0.5084	0.507814	0.512921	0.518638	0.521765	0.531475	0.537601	0.549292
323	o_2D_11	012Dc11	Ohakuri	New Zealand	clastic	1.561	0.4	36.9	36.93	12.79	20	40	uni_OI_2D_11.txt	0.539756	0.513954	0.518503	0.525031	0.489905	0.476773	0.450613	0.417617	0.435837	0.415648	0.414905	0.421282	0.411611	0.425662	0.425077	0.429563	0.436795	0.442851	0.448546	0.457886	0.467008	0.47263	0.478224	0.478914	0.482531	0.484498	0.485172	0.488681	0.488356	0.489737	0.49348	0.497933	0.504559	0.51243	0.521463	0.529894
324	o_T3_1	01T3c1	Ohakuri	New Zealand	clastic	1.241	0.48	9.2	9.21	2.73	20	40	uni_OI_T3_1_d.txt	0.588597	0.623672	0.573025	0.604973	0.634193	0.623837	0.625949	0.612788	0.653617	0.662335	0.682649	0.701488	0.716874	0.726005	0.736005	0.746766	0.763548	0.775189	0.783167	0.784034	0.794081	0.803149	0.814293	0.816605	0.821895	0.826794	0.831074	0.836956	0.846245	0.84806	0.852717	0.859227	0.861872	0.869697	0.874352	0.880544
325	o_T3_2	01T3c2	Ohakuri	New Zealand	clastic	1.248	0.48	9	8.98	2.70	20	40	uni_OI_T3_2_d.txt	0.472828	0.495683	0.483762	0.50393	0.505345	0.510814	0.529138	0.55307	0.577314	0.606003	0.603385	0.62445	0.647187	0.656315	0.675021	0.676914	0.692972	0.70444	0.712442	0.722207	0.728848	0.735926	0.741332	0.747544	0.752564	0.759261	0.761677	0.765887	0.77274	0.773759	0.778801	0.78506	0.788671	0.795754	0.798769	0.804197
326	o_T2_c2	01T4c2	Ohakuri	New Zealand	clastic				5.90	1.97	20	40	uni_OI_T2_2_d.txt	0.412983	0.394668	0.397355	0.430461	0.469651	0.4573	0.459805	0.492274	0.51675	0.55709	0.561629	0.578985	0.607474	0.623855	0.641535	0.657922	0.664	0.684308	0.698779	0.712576	0.721434	0.731117	0.73965	0.750395	0.75463	0.76479	0.768306	0.775628	0.781066	0.785994	0.794084	0.803127	0.808167	0.818094	0.821777	0.829877
327	o_T2_c3	01T4c3	Ohakuri	New Zealand	clastic				5.53	1.03	20	40	uni_OI_T2_3_d.txt	0.38692	0.424229	0.393847	0.432549	0.422351	0.451457	0.472781	0.508388	0.519713	0.550835	0.559632	0.582977	0.608064	0.617171	0.631156	0.646999	0.665568	0.678111	0.690495	0.705352	0.710343	0.722322	0.730734	0.740469	0.74709	0.753386	0.760161	0.765606	0.770053	0.777462	0.783358	0.790775	0.797043	0.805125	0.810255	0.817981
[truncated: 825 more columns]
