# Supplementary material for: Hyperspectral mapping of density, porosity, stiffness, and strength in hydrothermally altered volcanic rocks
Source: Copernicus journal article supplement (doi:10.5194/se-16-1249-2025), 2025-11-03
Supplement: Supplementary file [file se-16-1249-2025-supplement-title-page.pdf › se-16-1249-2025-supplement-title-page.pdf]

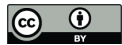

## *Supplement of*

# **Hyperspectral mapping of density, porosity, stiffness, and strength in hydrothermally altered volcanic rocks**

**Samuel T. Thiele et al.**

*Correspondence to:* Samuel T. Thiele ([s.thiele@hzdr.de](mailto:s.thiele@hzdr.de))

- `se-16-1249-2025-supplement-title-page.pdf`
- `suppInfo`
  - `.DS_Store`
  - `.ipynb_checkpoints`
    - \* `1_Alteration-checkpoint.ipynb`
    - \* `2_DataPrep-checkpoint.ipynb`
    - \* `3_Regressions-checkpoint.ipynb`
    - \* `4_EnsemblePrediction-checkpoint.ipynb`
    - \* `5_SHAP-checkpoint.ipynb`
  - `1_Alteration.ipynb`
  - `2_DataPrep.ipynb`
  - `3_Regressions.ipynb`
  - `4_EnsemblePrediction.ipynb`
  - `5_SHAP.ipynb`
  - `README.md`
  - `SWIR_MWIR_LWIR_SpecLib_v3b.xlsx`
  - `lwir.hdr`
  - `lwir.lib`
  - `mechAvg.npy`
  - `mwir.hdr`
  - `mwir.lib`
  - `sampleIDs.npy`
  - `shap_andesite_all.png`
  - `shap_basalt_all.png`
  - `swir.hdr`
  - `swir.lib`
  - `volcanoes.npy`

The copyright of individual parts of the supplement might differ from the article licence.
